# Supplementary material
Source: MDPI journal article supplement (https://www.mdpi.com/2073-4441/14/20/3224)
Supplement: s1 [file s1]

# Desalination of Water Using Metal Polymers

David D. J. Antia<sup>1,\*</sup>

<sup>1</sup> DCA Consultants Ltd. The Bungalow, Castleton Farm, Falkirk, FK2 8SD, UK;

\* Correspondence: dcacl@btconnect.com

## Contents

Figure S1. Entrained polymer placed in seawater at a concentration of 0.2 g Fe L<sup>-1</sup>.  
Figure S2. Water salinity desalination polymer quality control check.  
Figure S3. Test trials illustrating the suitability of the entrained n-Fe@blue crop polymer  
Figure S4. High water salinity desalination C<sup>0</sup>:n-Fe@blue crop polymer pellet quality control check.  
Figure S5. Medium water salinity desalination pellet quality control check.  
Figure S6. Estuarine water salinity desalination pellet quality control check.  
Figure S7. Medium water salinity desalination polymer quality control check.  
Figure S8. Water salinity desalination polymer quality control check.  
Figure S9. Water salinity desalination polymer quality control check.  
Figure S10. Water salinity desalination polymer quality control check.  
Figure S11. Water salinity desalination polymer quality control check.  
Figure S12. Water salinity desalination polymer quality control check.  
Figure S13. Water salinity desalination polymer quality control check.  
Figure S14. Water salinity desalination polymer quality control check.  
Figure S15. Water salinity desalination polymer quality control check.  
Figure S16. Water salinity desalination polymer quality control check.  
Figure S17. Water salinity desalination polymer quality control check.  
Figure S18. Water salinity desalination polymer quality control check.  
Figure S19. Water salinity desalination polymer quality control check.  
Figure S20. Water salinity desalination polymer quality control check.  
Figure S21. Water salinity desalination polymer quality control check.  
Figure S22. Water salinity desalination polymer quality control check.  
Figure S23. Water salinity desalination polymer quality control check.  
Figure S24. Water salinity desalination polymer quality control check.

Table S1. Regressed ( $C_{t=n}/C_{t=0}$ ) ion concentration for chloride as a function of reaction time (hours)

Table S2. Regressed ( $C_{t=n}/C_{t=0}$ ) ion concentration for sodium as a function of reaction time (hours)

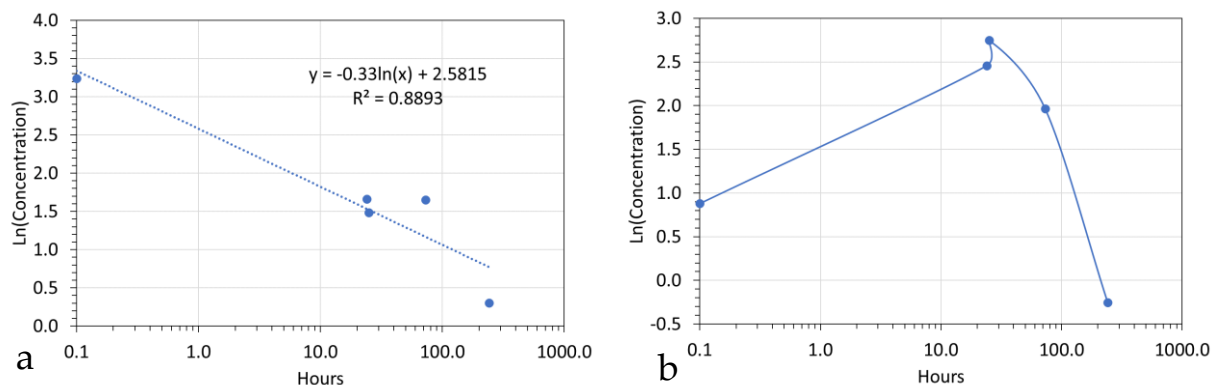

Figure S1. Entrained polymer placed in seawater at a concentration of  $0.2 \text{ g Fe L}^{-1}$ . Polymer formed from:  $0.43 \text{ g FeSO}_4 + 0.73 \text{ g CaO} + 1.09 \text{ g MnO}_2 + 0.2 \text{ g HCOOH L}^{-1}$ . (a),  $\text{Cl}^-$  ion concentration,  $\text{g L}^{-1}$ , vs time.; (b),  $\text{Na}^+$  ion concentration,  $\text{g L}^{-1}$ , vs time. The  $\text{Cl}^-$  ion removal follows a zero-order reaction. Placement in Sea water ( $\text{pH} = 8.31$ ;  $\text{Eh} = 372 \text{ mV}$ ; Temperature =  $4.8^\circ\text{C}$ ;  $\text{Cl}^- = 26.55 \text{ g L}^{-1}$ ;  $\text{Na}^+ = 17.21 \text{ g L}^{-1}$ ) produced a product water after 261 hours ( $\text{pH} = 11.85$ ;  $\text{Eh} = -45 \text{ mV}$ ; Temperature =  $7.0^\circ\text{C}$ ;  $\text{Cl}^- = 1.35 \text{ g L}^{-1}$ ;  $\text{Na}^+ = 0.78 \text{ g L}^{-1}$ ).

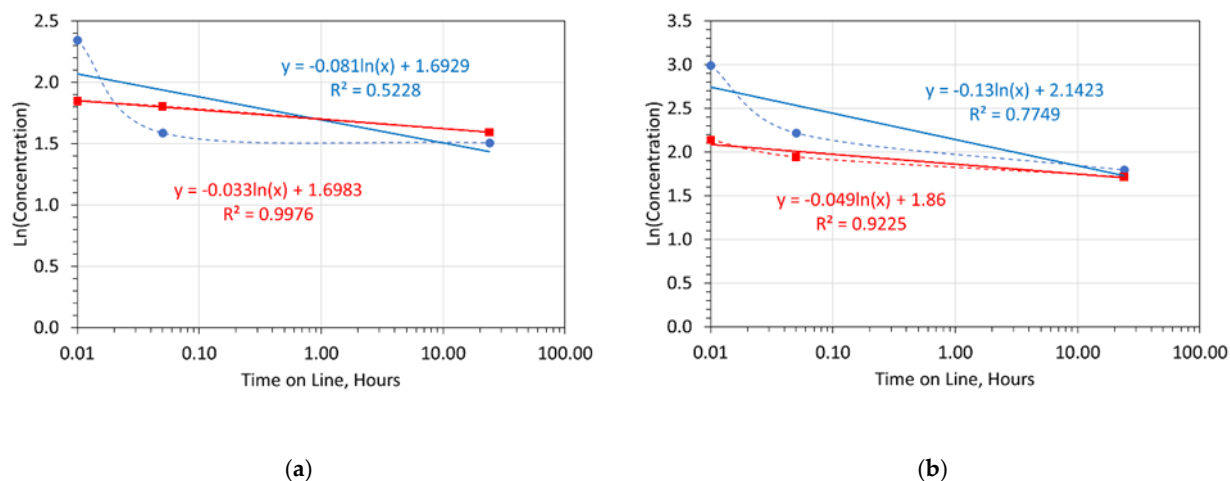

Figure S2. Water salinity desalination polymer quality control check. (a) Feed water salinity =  $10.44 \text{ g Cl}^- \text{ L}^{-1} + 6.33 \text{ g Na}^+ \text{ L}^{-1}$ ;  $2.3 \text{ L water (2g FeSO}_4 + 3.34 \text{ g CaO} + 5.61 \text{ g ZnO} + 1 \text{ cm}^3 (40\%) \text{ HCOOH L}^{-1})$ . (b) Feed water salinity =  $19.94 \text{ g Cl}^- \text{ L}^{-1} + 8.47 \text{ g Na}^+ \text{ L}^{-1}$ ;  $2.3 \text{ L water (2g FeSO}_4 + 3.34 \text{ g CaO} + 5.61 \text{ g ZnO} + 0.83 \text{ g C}_6\text{H}_5\text{O}_7 \text{ L}^{-1})$ .  $\text{Cl}^-$  ions (blue dots) and  $\text{Na}^+$  ions (red dots).  $\text{Na}^+$  and  $\text{Cl}^-$  ions are removed by separate processes. Ion removal is by zero-order reactions.

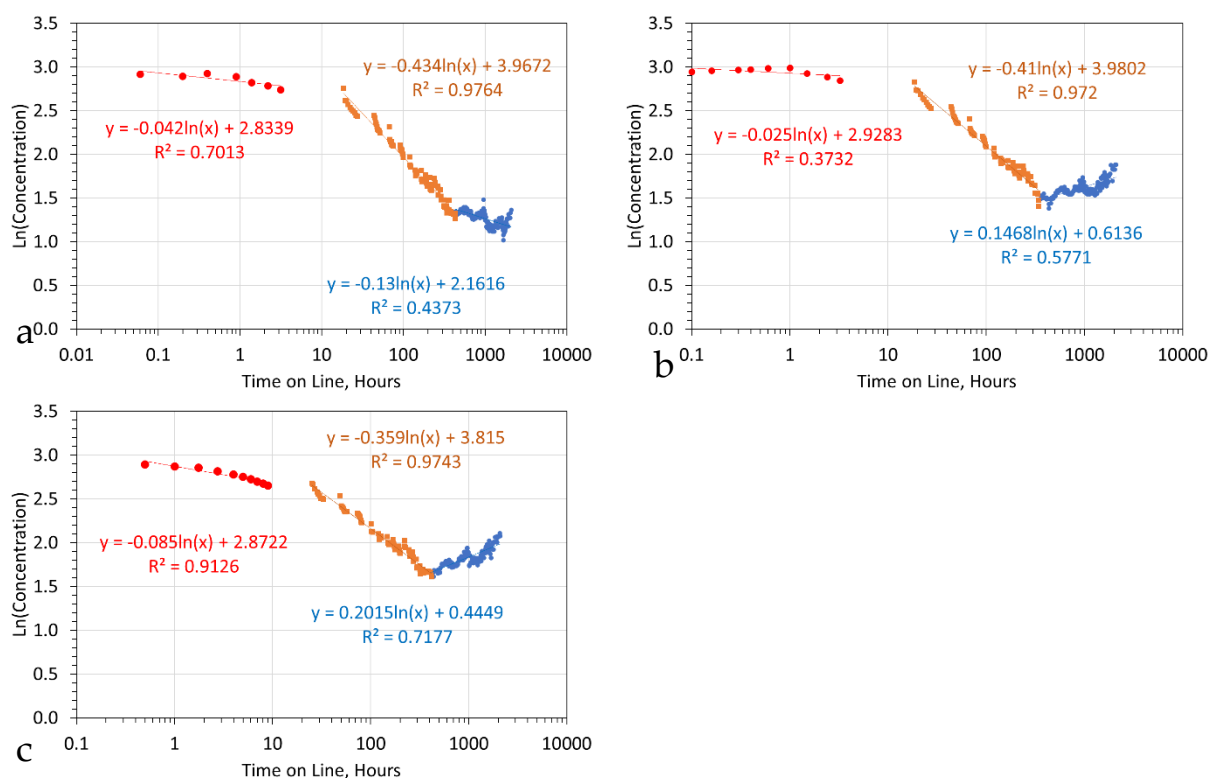

Figure S3. Test trials illustrating the suitability of the entrained n-Fe@blue crop polymer (entrained concentration 0.6 g Fe L<sup>-1</sup> in the water) for the removal of Cl<sup>-</sup> ions from sea water, containing 18.65 g Cl<sup>-</sup> L<sup>-1</sup>. Temperature range = 5 to 15 °C. Each example reduced the Cl<sup>-</sup> concentration to below 5 g Cl<sup>-</sup> L<sup>-1</sup> (>70% removal), before the Cl<sup>-</sup> concentrations stabilized or started to increase; (a) Blue Crop berry juice; (b) Blue Crop leaf extract; (c) Blue Crop Stem extract.

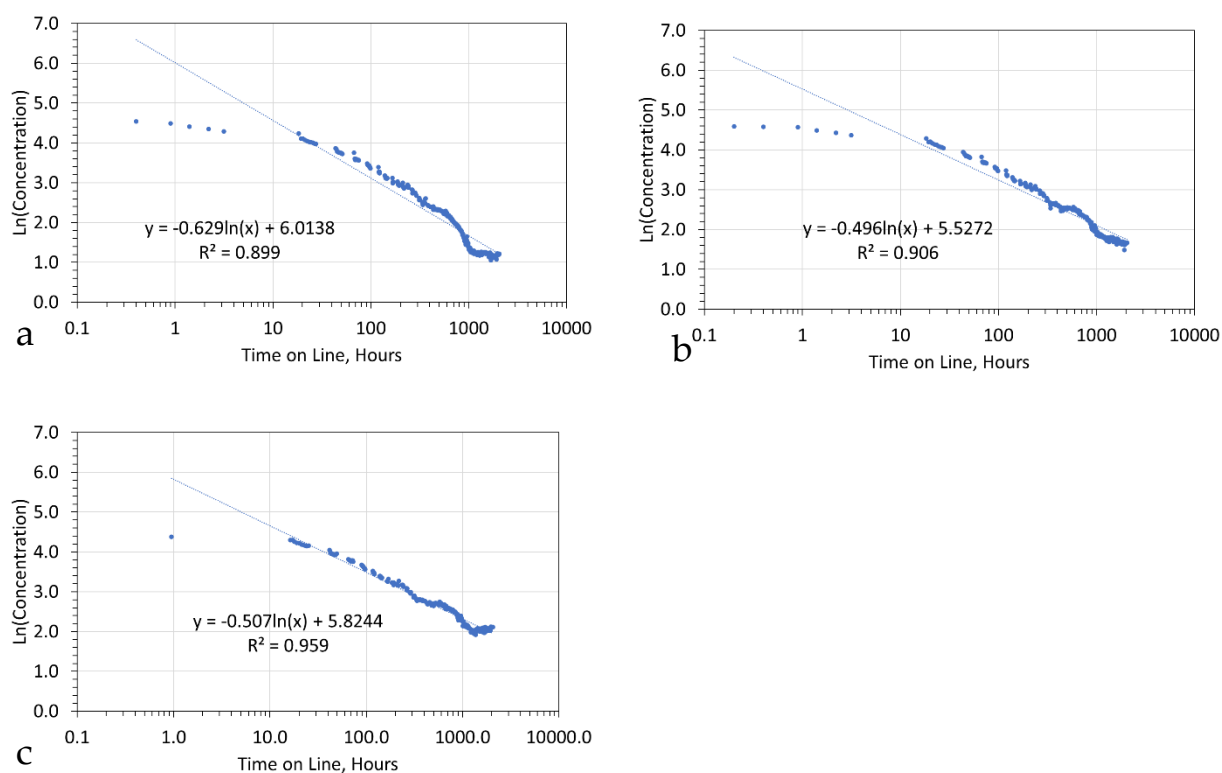

Figure S4. High water salinity desalination  $C^0:n$ -Fe@blue crop polymer pellet quality control check. (a) Feed water salinity = 96.64 g L<sup>-1</sup>; (b) Feed water salinity = 99.54 g L<sup>-1</sup>; (c) Feed water salinity = 84.12 g L<sup>-1</sup>; Ratio of Pellets: Water volume (200 cm<sup>3</sup> activated carbon pellets: 1 L water (maximum of 2 g Fe L<sup>-1</sup>)). The regression relationship indicates that after about 10 to 20 hours, the desalination reaction adopts a first-order reaction format.

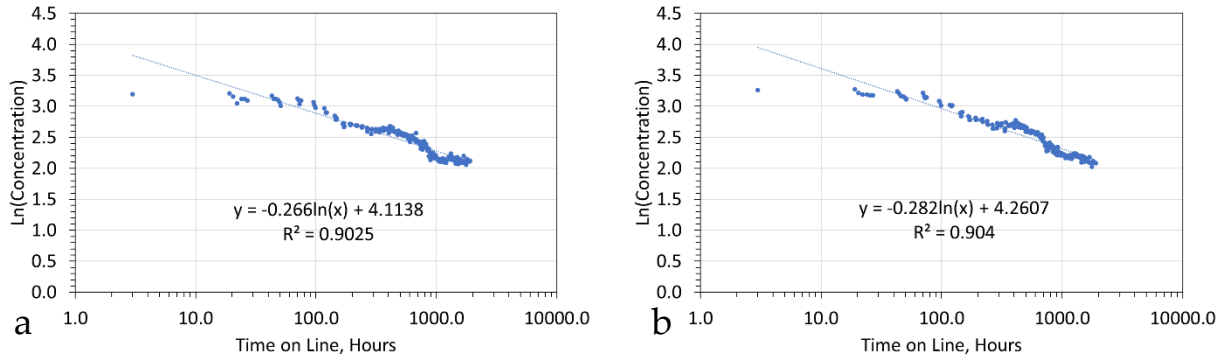

Figure S5. Medium water salinity desalination pellet quality control check. (a) Feed water salinity = 26.45 g L<sup>-1</sup>; (b) Feed water salinity = 27.76 g L<sup>-1</sup>; Ratio of Pellets: Water volume (200 cm<sup>3</sup> activated carbon pellets: 1 L water (maximum of 2 g Fe L<sup>-1</sup>)). The regression relationship indicates that after about 80 to 100 hours, the desalination reaction adopts a zero-order reaction format.

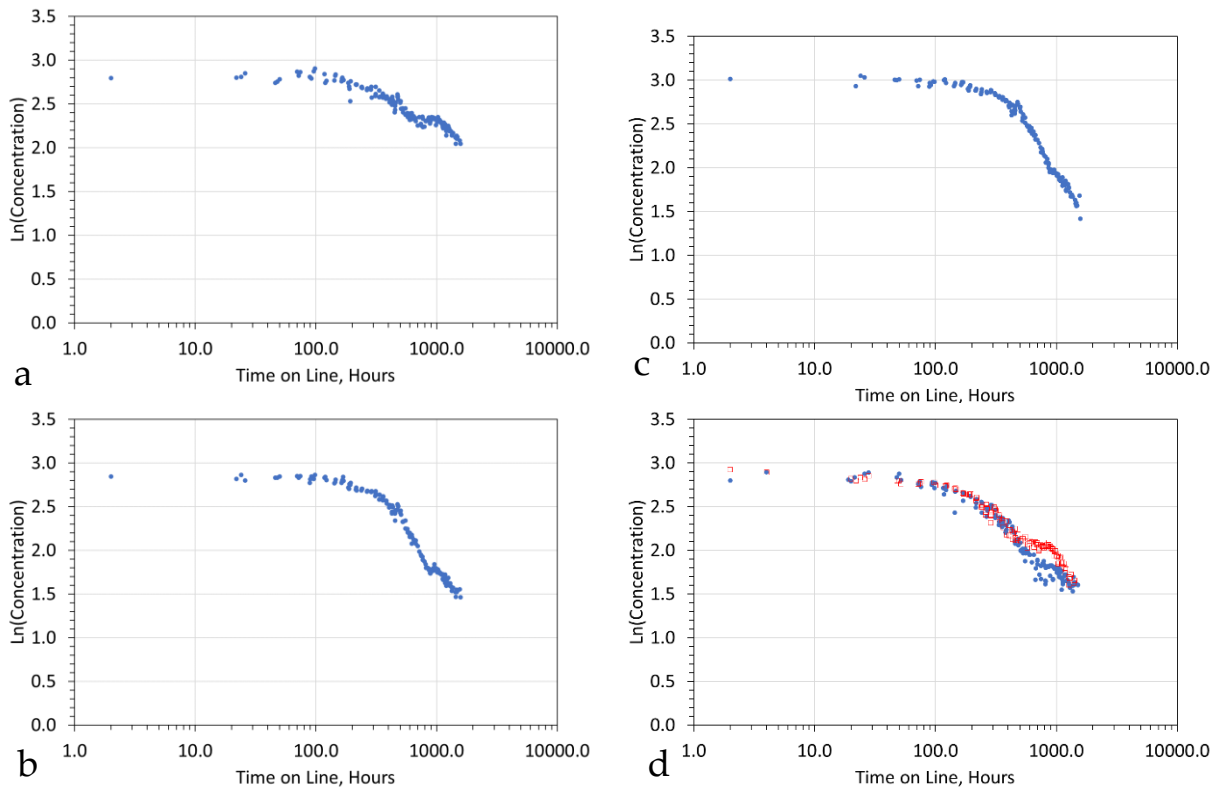

Figure S6. Estuarine water salinity desalination pellet quality control check. (a) Feed water salinity = 18.04 g L<sup>-1</sup>; (b) Feed water salinity = 18.97 g L<sup>-1</sup>; (c) Feed water salinity = 21.62 g L<sup>-1</sup>; (d) Blue dots: Feed

water salinity = 17.82 g L<sup>-1</sup>; Red dots: Feed water salinity = 18.87 g L<sup>-1</sup>; Ratio of Pellets: Water volume (200 cm<sup>3</sup> activated carbon pellets: 1 L water (maximum of 2 g Fe L<sup>-1</sup>)). The regression relationship indicates that after about 100 to 300 hours, the desalination reaction adopts a zero-order reaction format.

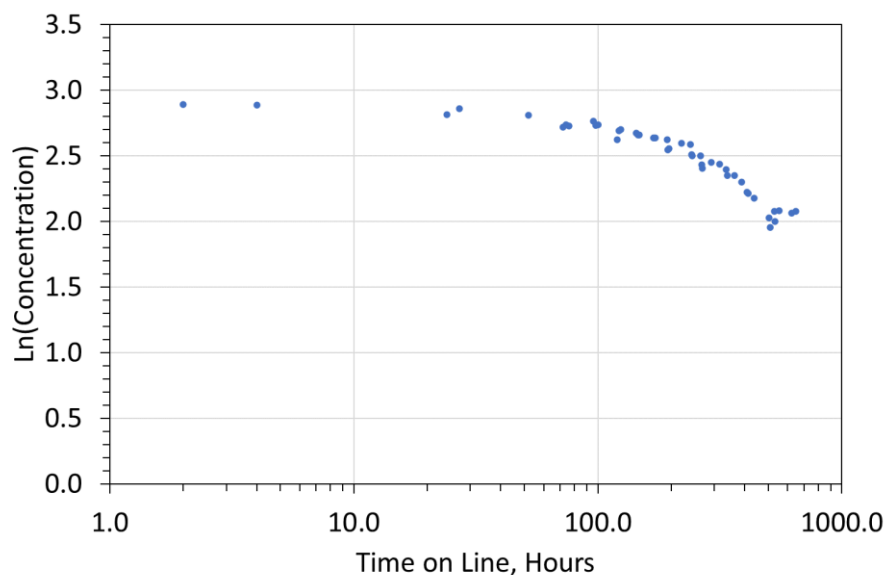

Figure S7. Medium water salinity desalination polymer quality control check. Feed water salinity = 19.12 g L<sup>-1</sup>; 1 L water (maximum of 2 g Fe L<sup>-1</sup>). The regression relationship indicates that after about 200 hours, the desalination reaction adopts a zero-order reaction format.

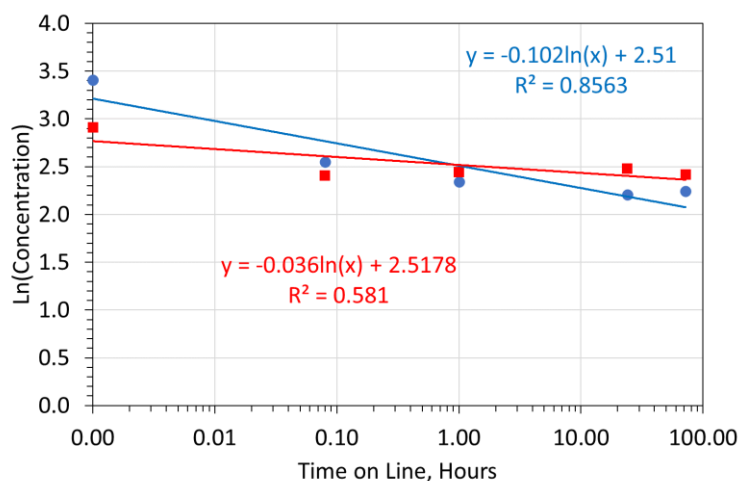

Figure S8. Water salinity desalination polymer quality control check. Feed water salinity = 30.14 g Cl<sup>-</sup> L<sup>-1</sup> + 18.38 g Na<sup>+</sup> L<sup>-1</sup>; 2.3 L water (maximum of 0.3 g Fe L<sup>-1</sup>). The desalination reaction adopts a zero-order reaction format, for the removal of both Cl<sup>-</sup> ions (blue dots) and Na<sup>+</sup> ions (red dots). Polymer constructed from the weight ratios: 1.42 g FeSO<sub>4</sub> + 1.36 g urea + 3.34 g CaO. Removed: 70% Cl<sup>-</sup> ions + 40% Na<sup>+</sup> ions.

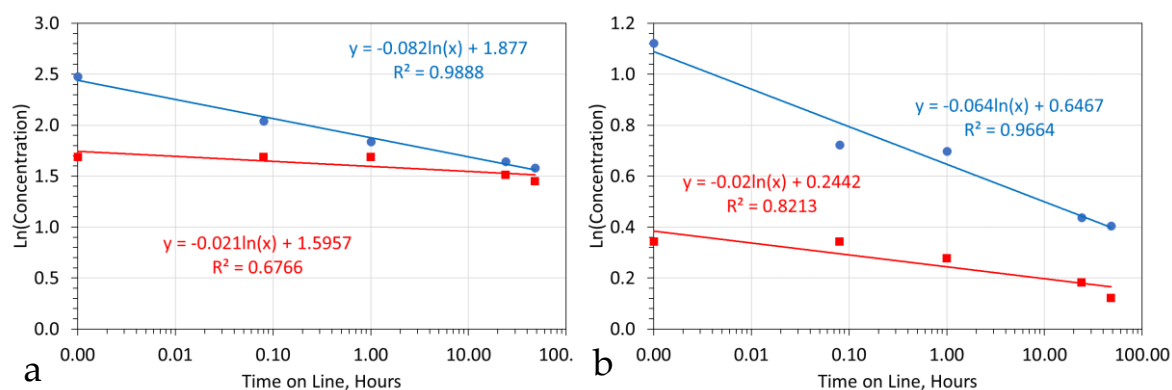

Figure S9. Water salinity desalination polymer quality control check. (a) Feed water salinity = 11.92 g Cl<sup>-</sup> L<sup>-1</sup> + 5.41 g Na<sup>+</sup> L<sup>-1</sup>; 2.3 L water (maximum of 1 g Ca L<sup>-1</sup>). (b) Feed water salinity = 3.07 g Cl<sup>-</sup> L<sup>-1</sup> + 1.41 g Na<sup>+</sup> L<sup>-1</sup>; 2.3 L water (maximum of 1 g Ca L<sup>-1</sup>). The desalination reaction adopts a zero-order reaction format, for the removal of both Cl<sup>-</sup> ions (blue dots) and Na<sup>+</sup> ions (red dots). Polymer constructed from the weight ratios: 1.36 g urea + 3.34 g CaO. Removed: 70% Cl<sup>-</sup> ions + 40% Na<sup>+</sup> ions.

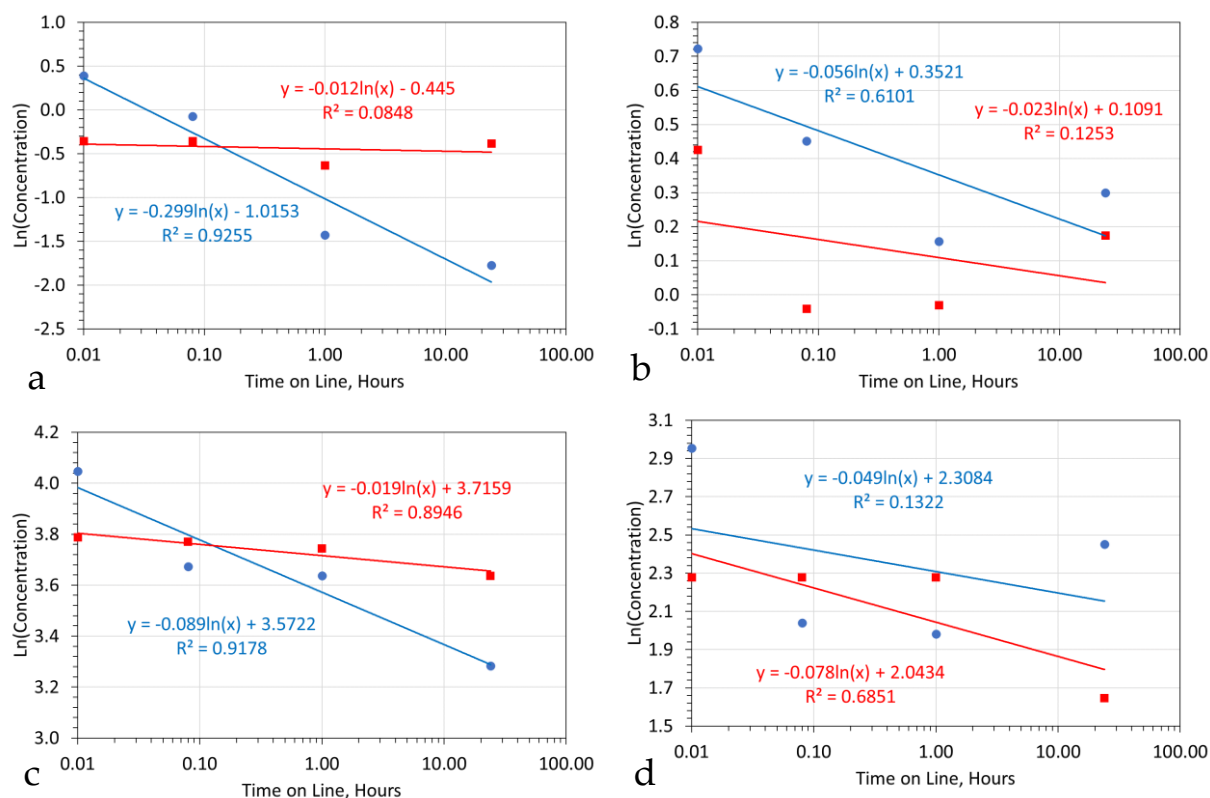

Figure S10. Water salinity desalination polymer quality control check. (a) Feed water salinity = 1.48 g Cl<sup>-</sup> L<sup>-1</sup> + 0.7 g Na<sup>+</sup> L<sup>-1</sup>; 2.3 L water (1.51 g MgSO<sub>4</sub> + 1.2 g Al(OH)<sub>3</sub> L<sup>-1</sup>). (b) Feed water salinity = 2.06 g Cl<sup>-</sup> L<sup>-1</sup> + 1.53 g Na<sup>+</sup> L<sup>-1</sup>; 2.3 L water (3.02 g MgSO<sub>4</sub> + 2.4 g Al(OH)<sub>3</sub> L<sup>-1</sup>). (c) Feed water salinity = 57.26 g Cl<sup>-</sup> L<sup>-1</sup> + 44.14 g Na<sup>+</sup> L<sup>-1</sup>; 2.3 L water (1.51 g MgSO<sub>4</sub> + 1.34 g Al<sub>2</sub>(SO<sub>4</sub>)<sub>3</sub> + 1.2 g Al(OH)<sub>3</sub> L<sup>-1</sup>). (d) Feed water salinity = 19.17 g Cl<sup>-</sup> L<sup>-1</sup> + 9.76 g Na<sup>+</sup> L<sup>-1</sup>; 2.3 L water (3.02 g MgSO<sub>4</sub> + 1.34 g Al<sub>2</sub>(SO<sub>4</sub>)<sub>3</sub> + 2.4 g Al(OH)<sub>3</sub> L<sup>-1</sup>).

<sup>1</sup>). The desalination reaction adopts a zero-order reaction format, for the removal of both Cl<sup>-</sup> ions (blue dots) and Na<sup>+</sup> ions (red dots). Na<sup>+</sup> and Cl<sup>-</sup> ions are removed by separate processes.

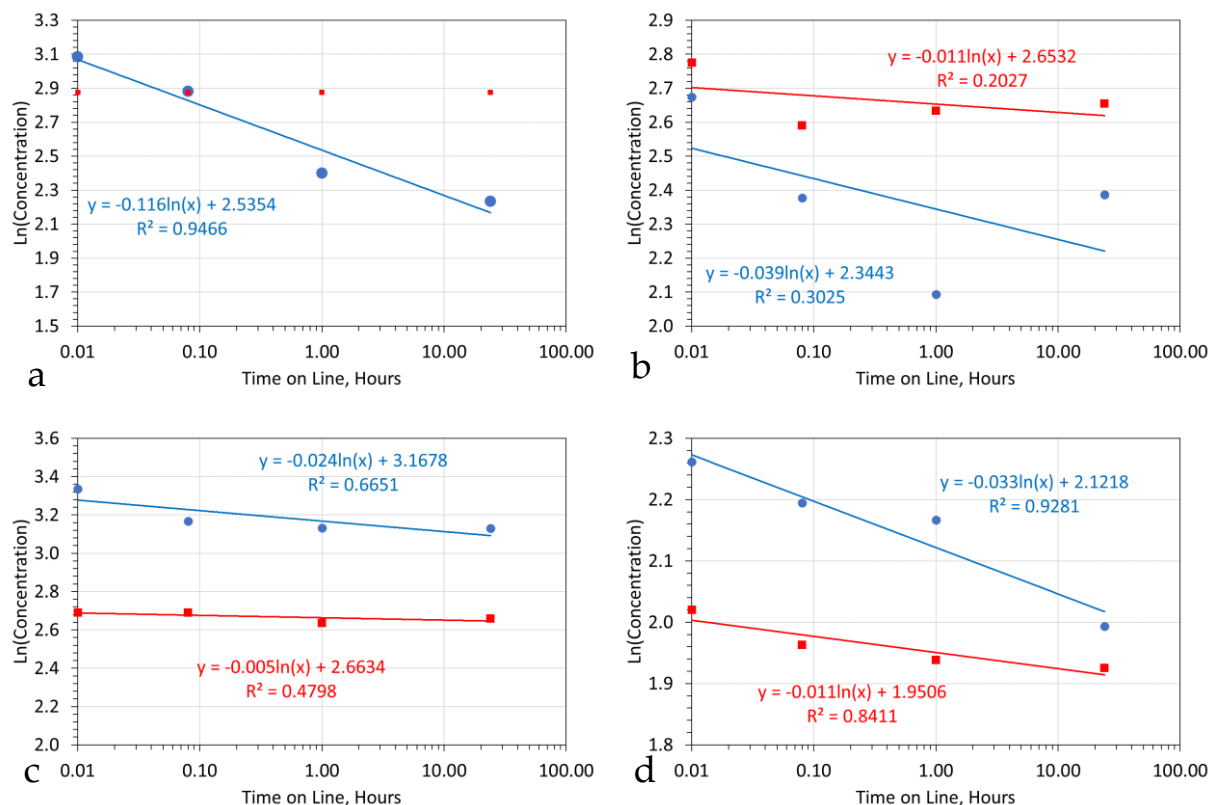

Figure S11. Water salinity desalination polymer quality control check. (a) Feed water salinity = 21.87 g Cl<sup>-</sup> L<sup>-1</sup> + 17.74 g Na<sup>+</sup> L<sup>-1</sup>; 2.3 L water (1.51 g MgSO<sub>4</sub> + 1.34 g Al<sub>2</sub>(SO<sub>4</sub>)<sub>3</sub> + 1.2 g Al(OH)<sub>3</sub> L<sup>-1</sup>). (b) Feed water salinity = 14.5 g Cl<sup>-</sup> L<sup>-1</sup> + 16.04 g Na<sup>+</sup> L<sup>-1</sup>; 2.3 L water (1.51 g MgSO<sub>4</sub> + 1.34 g Al<sub>2</sub>(SO<sub>4</sub>)<sub>3</sub> + 1.2 g Al(OH)<sub>3</sub> L<sup>-1</sup>). (c) Feed water salinity = 28.1 g Cl<sup>-</sup> L<sup>-1</sup> + 14.73 g Na<sup>+</sup> L<sup>-1</sup>; 2.3 L water (1.51 g MgSO<sub>4</sub> + 1.34 g Al<sub>2</sub>(SO<sub>4</sub>)<sub>3</sub> + 1.2 g Al(OH)<sub>3</sub> L<sup>-1</sup>). (d) Feed water salinity = 9.6 g Cl<sup>-</sup> L<sup>-1</sup> + 7.54 g Na<sup>+</sup> L<sup>-1</sup>; 2.3 L water (1.51 g MgSO<sub>4</sub> + 1.34 g Al<sub>2</sub>(SO<sub>4</sub>)<sub>3</sub> + 1.2 g Al(OH)<sub>3</sub> L<sup>-1</sup>). The desalination reaction adopts a zero-order reaction format, for the removal of both Cl<sup>-</sup> ions (blue dots) and Na<sup>+</sup> ions (red dots). Na<sup>+</sup> and Cl<sup>-</sup> ions are removed by separate processes.

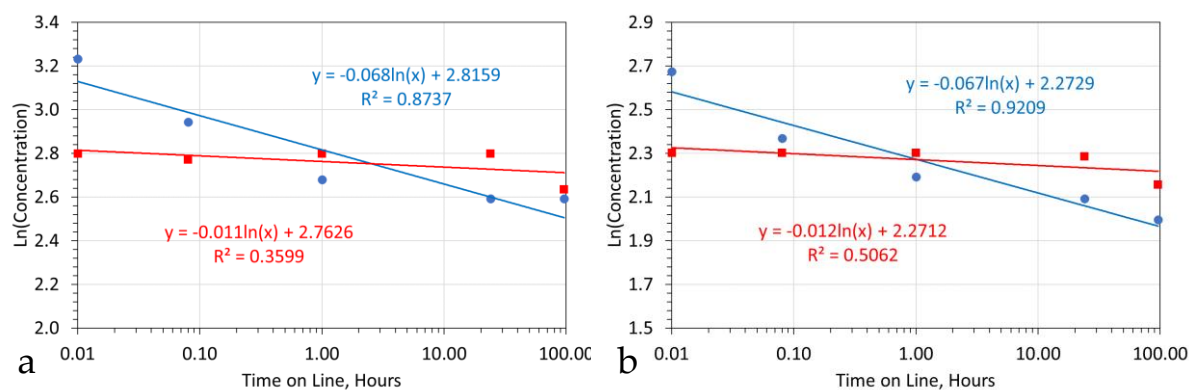

Figure S12. Water salinity desalination polymer quality control check. (a) Feed water salinity = 25.36 g  $\text{Cl}^- \text{L}^{-1}$  + 16.44 g  $\text{Na}^+ \text{L}^{-1}$ ; 2.3 L water (1.67 g  $\text{CaO}$  + 2.52 g  $\text{MnO}_2$  + 1.99 g  $\text{Al}_2\text{O}_3 \text{L}^{-1}$ ). (b) Feed water salinity = 14.5 g  $\text{Cl}^- \text{L}^{-1}$  + 9.99 g  $\text{Na}^+ \text{L}^{-1}$ ; 2.3 L water (1.67 g  $\text{CaO}$  + 2.52 g  $\text{MnO}_2$  + 1.99 g  $\text{Al}_2\text{O}_3 \text{L}^{-1}$ ).  $\text{Cl}^-$  ions (blue dots) and  $\text{Na}^+$  ions (red dots).  $\text{Na}^+$  and  $\text{Cl}^-$  ions are removed by separate processes. Temperature = 13.7 to 15.4 °C.

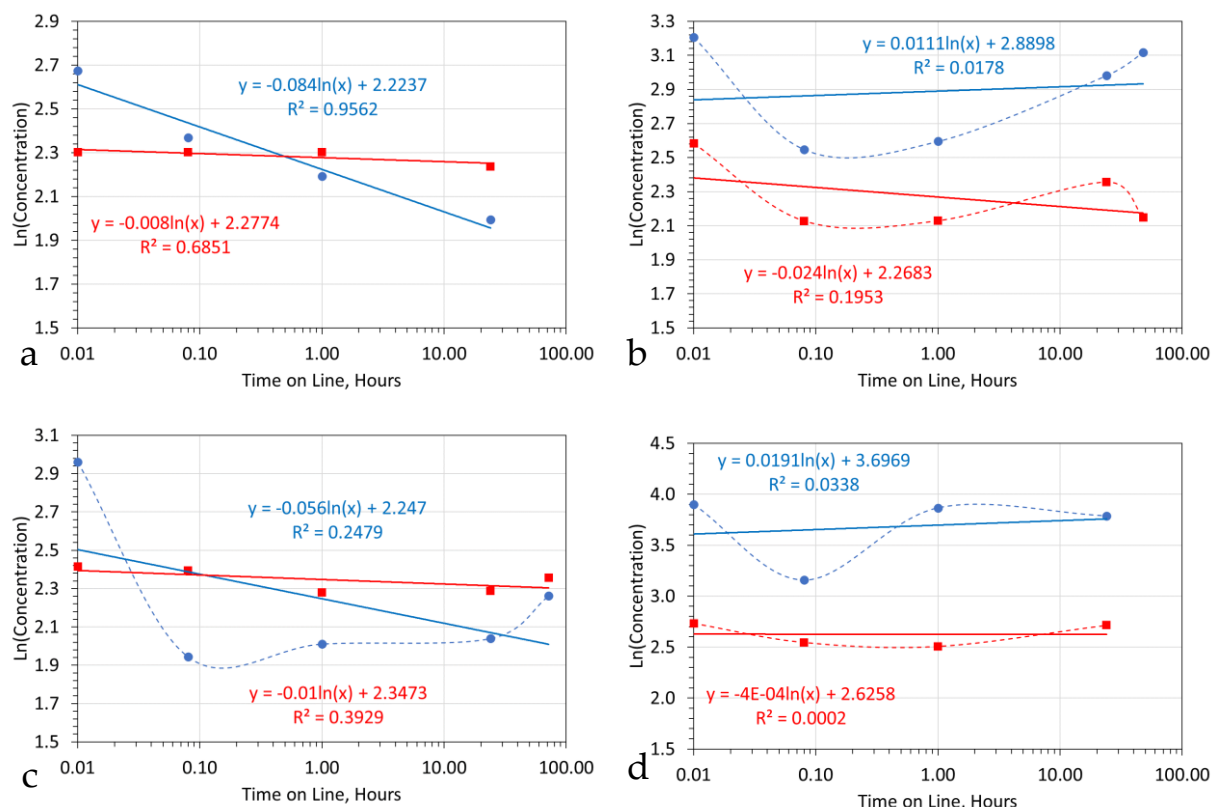

Figure S13. Water salinity desalination polymer quality control check. (a) Feed water salinity = 14.5 g  $\text{Cl}^- \text{L}^{-1}$  + 9.99 g  $\text{Na}^+ \text{L}^{-1}$ ; 2.3 L water (1.67 g  $\text{CaO}$  + 1.99 g  $\text{Al}_2\text{O}_3 \text{L}^{-1}$ ). (b) Feed water salinity = 24.67 g  $\text{Cl}^- \text{L}^{-1}$  + 13.23 g  $\text{Na}^+ \text{L}^{-1}$ ; 2.3 L water (1.67 g  $\text{CaO}$  + 2.81 g  $\text{ZnO}$  + 1.34 g  $\text{Al}_2(\text{SO}_4)_3$  + 1.2 g  $\text{Al}(\text{OH})_3 \text{L}^{-1}$ ). (c) Feed water salinity = 19.3 g  $\text{Cl}^- \text{L}^{-1}$  + 11.18 g  $\text{Na}^+ \text{L}^{-1}$ ; 2.3 L water (3.34 g  $\text{CaO}$  + 4.22 g  $\text{ZnO}$  + 2.0 g  $\text{Al}_2(\text{SO}_4)_3$  + 1.8 g  $\text{Al}(\text{OH})_3 \text{L}^{-1}$ ). (d) Feed water salinity = 49.31 g  $\text{Cl}^- \text{L}^{-1}$  + 15.40 g  $\text{Na}^+ \text{L}^{-1}$ ; 2.3 L water (1.67 g  $\text{CaO}$  + 4.22 g  $\text{ZnO}$  + 2.0 g  $\text{Al}_2(\text{SO}_4)_3$  + 1.8 g  $\text{Al}(\text{OH})_3 \text{L}^{-1}$ ).  $\text{Cl}^-$  ions (blue dots) and  $\text{Na}^+$  ions (red dots).  $\text{Na}^+$  and  $\text{Cl}^-$  ions are removed by separate processes. Temperature = 14.2 to 18.1 °C.



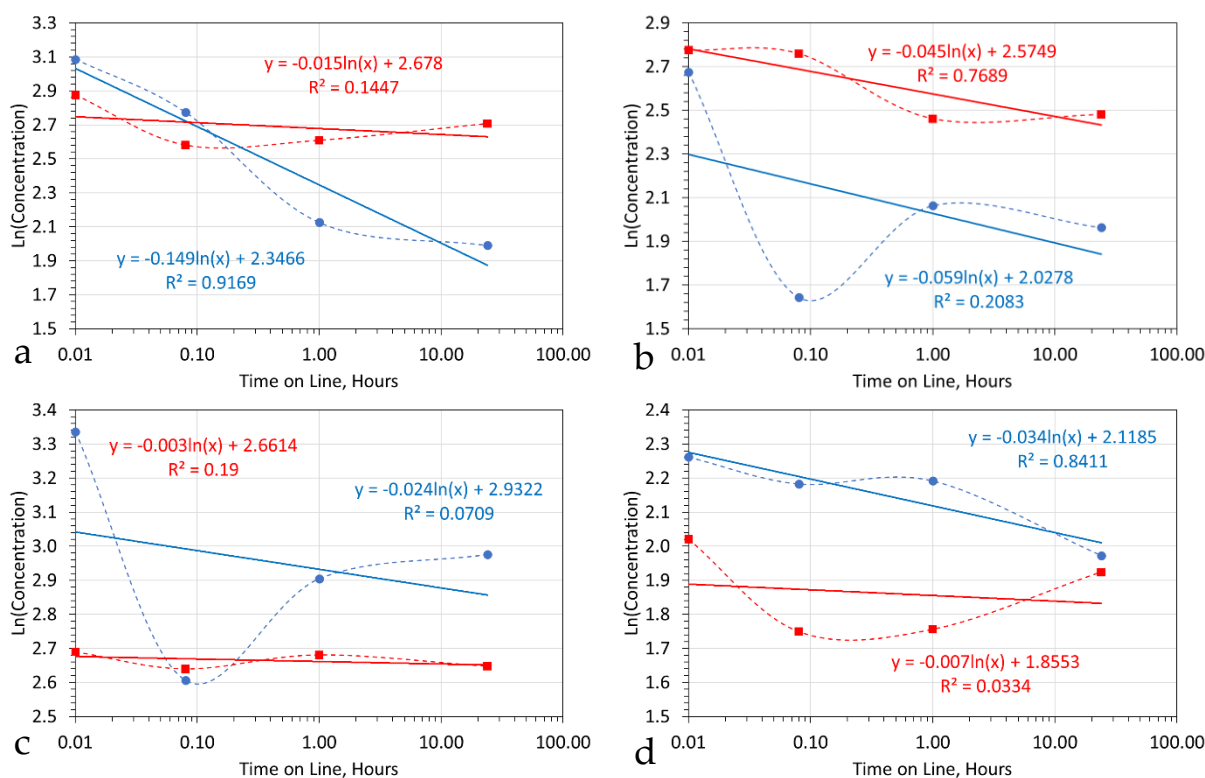

Figure S14. Water salinity desalination polymer quality control check. (a) Feed water salinity = 21.87 g Cl⁻ L⁻¹ + 17.74 g Na⁺ L⁻¹; 2.3 L water (1.67 g CaO + 1.51 g MgSO₄ + 1.34 g Al₂(SO₄)₃ + 1.2 g Al(OH)₃ L⁻¹). (b) Feed water salinity = 14.50 g Cl⁻ L⁻¹ + 16.40 g Na⁺ L⁻¹; 2.3 L water (1.67 g CaO + 1.51 g MgSO₄ + 1.34 g Al₂(SO₄)₃ + 1.2 g Al(OH)₃ L⁻¹). (c) Feed water salinity = 28.1 g Cl⁻ L⁻¹ + 14.73 g Na⁺ L⁻¹; 2.3 L water (1.67 g CaO + 1.51 g MgSO₄ + 1.34 g Al₂(SO₄)₃ + 1.2 g Al(OH)₃ L⁻¹). (d) Feed water salinity = 9.6 g Cl⁻ L⁻¹ + 7.54 g Na⁺ L⁻¹; 2.3 L water (2.27 g MgSO₄ + 1.22 g K₂CO₃ + 1.2 g Al(OH)₃ L⁻¹). Cl⁻ ions (blue dots) and Na⁺ ions (red dots). Na⁺ and Cl⁻ ions are removed by separate processes. Temperature = 14.3 to 18.3 °C.

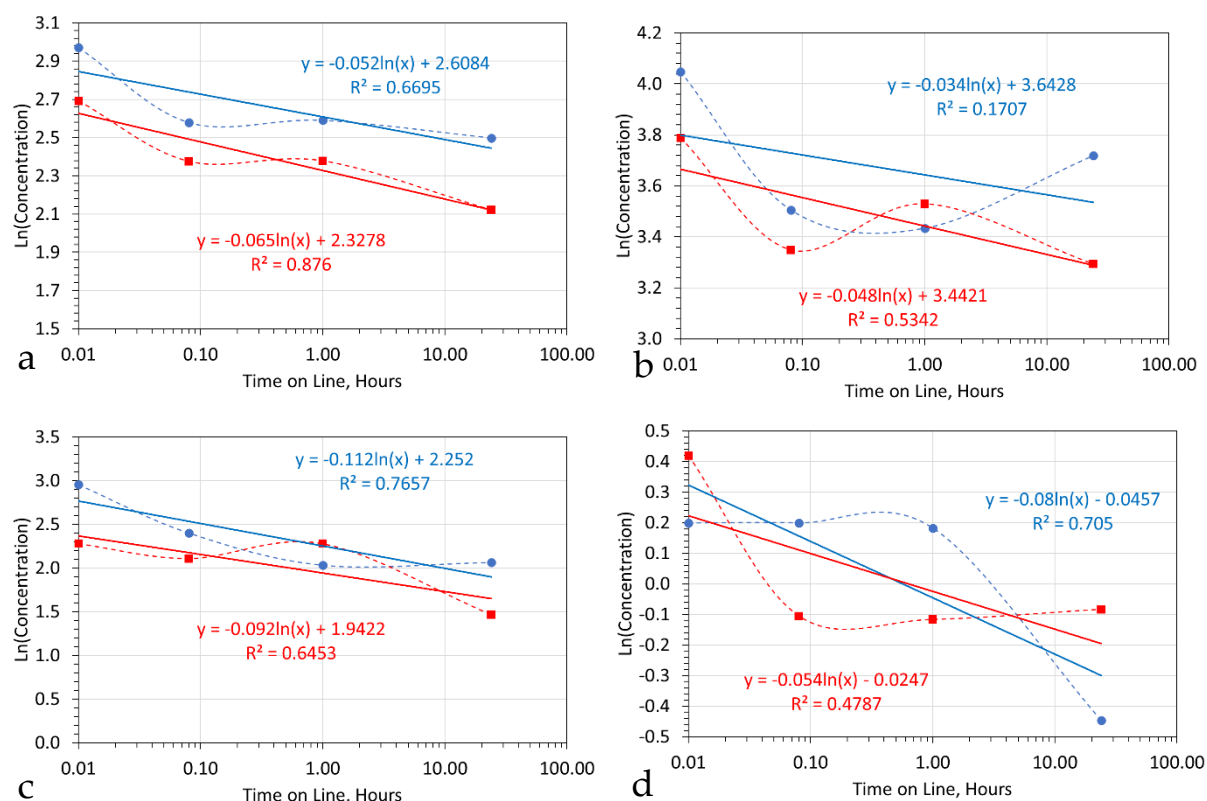

Figure S15. Water salinity desalination polymer quality control check. (a) Feed water salinity = 19.5 g Cl<sup>-</sup> L<sup>-1</sup> + 14.75 g Na<sup>+</sup> L<sup>-1</sup>; 2.3 L water (1.67 g CaO + 3.02 g MgSO<sub>4</sub> + 3.60 g Al(OH)<sub>3</sub> L<sup>-1</sup>). (b) Feed water salinity = 57.26 g Cl<sup>-</sup> L<sup>-1</sup> + 44.14 g Na<sup>+</sup> L<sup>-1</sup>; 2.3 L water (1.67 g CaO + 1.51 g MgSO<sub>4</sub> + 1.34 g Al<sub>2</sub>(SO<sub>4</sub>)<sub>3</sub> + 1.2 g Al(OH)<sub>3</sub> L<sup>-1</sup>). (c) Feed water salinity = 19.17 g Cl<sup>-</sup> L<sup>-1</sup> + 9.76 g Na<sup>+</sup> L<sup>-1</sup>; 2.3 L water (1.67 g CaO + 3.02 g MgSO<sub>4</sub> + 1.34 g Al<sub>2</sub>(SO<sub>4</sub>)<sub>3</sub> + 2.4 g Al(OH)<sub>3</sub> L<sup>-1</sup>). (d) Feed water salinity = 1.22 g Cl<sup>-</sup> L<sup>-1</sup> + 1.52 g Na<sup>+</sup> L<sup>-1</sup>; 2.3 L water (1.51 g MgSO<sub>4</sub> + 1.22 g K<sub>2</sub>CO<sub>3</sub> + 1.22 g Al<sub>2</sub>O<sub>3</sub> L<sup>-1</sup>). Cl<sup>-</sup> ions (blue dots) and Na<sup>+</sup> ions (red dots). Na<sup>+</sup> and Cl<sup>-</sup> ions are removed by separate processes. Temperature = 14.3 to 18.3 °C.

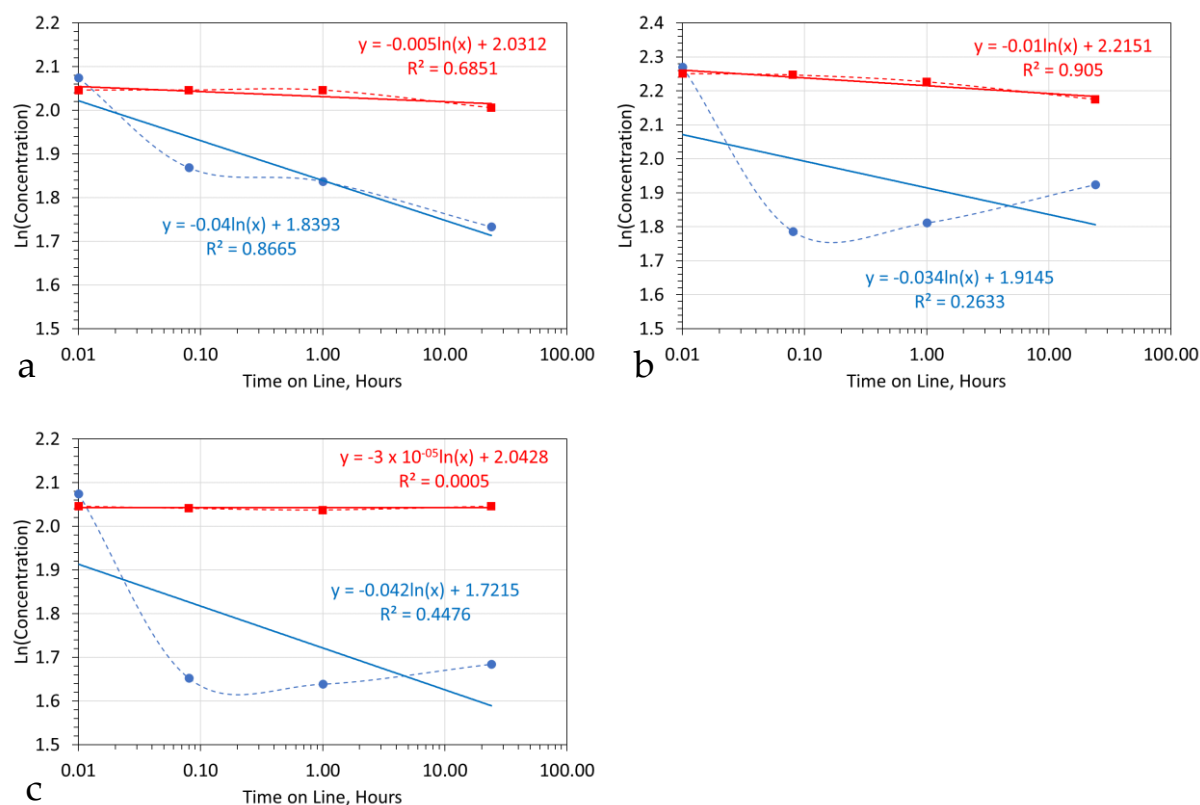

Figure S16. Water salinity desalination polymer quality control check. (a) Feed water salinity = 7.96 g  $\text{Cl}^- \text{L}^{-1}$  + 7.74 g  $\text{Na}^+ \text{L}^{-1}$ ; 2.3 L water (2.52 g  $\text{MnO}_2$  + 2.81 g  $\text{ZnO}$  + 1.34 g  $\text{Al}_2(\text{SO}_4)_3$ ). (b) Feed water salinity = 9.68 g  $\text{Cl}^- \text{L}^{-1}$  + 9.5 g  $\text{Na}^+ \text{L}^{-1}$ ; 2.3 L water (1.51 g  $\text{MgSO}_4$  + 2.52 g  $\text{MnO}_2$  + 3.66 g  $\text{K}_2\text{CO}_3$  + 1.2 g  $\text{Al}(\text{OH})_3 \text{L}^{-1}$ ). (c) Feed water salinity = 9.68 g  $\text{Cl}^- \text{L}^{-1}$  + 9.5 g  $\text{Na}^+ \text{L}^{-1}$ ; 2.3 L water (1.51 g  $\text{MgSO}_4$  + 2.52 g  $\text{MnO}_2$  + 1.2 g  $\text{Al}(\text{OH})_3 \text{L}^{-1}$ ).  $\text{Cl}^-$  ions (blue dots) and  $\text{Na}^+$  ions (red dots).  $\text{Na}^+$  and  $\text{Cl}^-$  ions are removed by separate processes. Temperature = 14.3 to 18.3 °C.

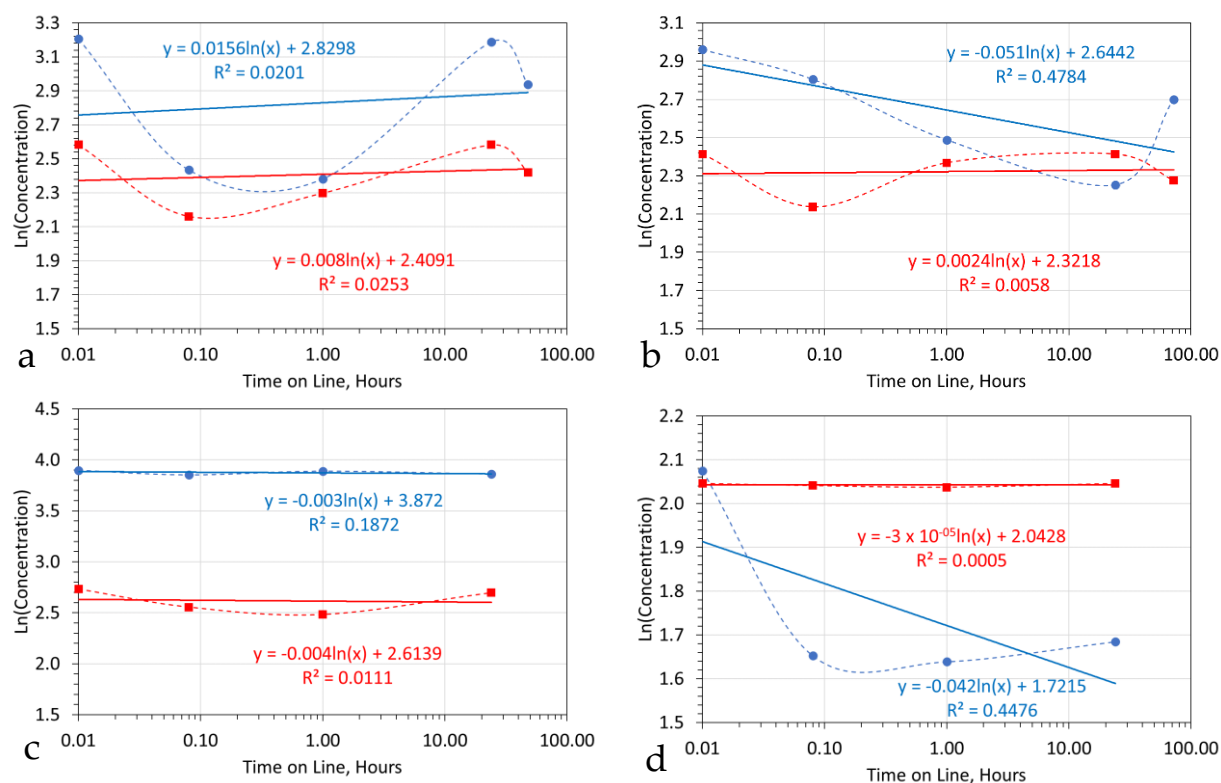

Figure S17. Water salinity desalination polymer quality control check. (a) Feed water salinity = 24.67 g  $\text{Cl}^- \text{ L}^{-1}$  + 13.32 g  $\text{Na}^+ \text{ L}^{-1}$ ; 2.3 L water (2.81 g  $\text{ZnO}$  + 1.34 g  $\text{Al}_2(\text{SO}_4)_3$  + 1.2 g  $\text{Al}(\text{OH})_3 \text{ L}^{-1}$ ). (b) Feed water salinity = 19.3 g  $\text{Cl}^- \text{ L}^{-1}$  + 11.18 g  $\text{Na}^+ \text{ L}^{-1}$ ; 2.3 L water (4.22 g  $\text{ZnO}$  + 2.00 g  $\text{Al}_2(\text{SO}_4)_3$  + 1.8 g  $\text{Al}(\text{OH})_3 \text{ L}^{-1}$ ). (c) Feed water salinity = 49.31 g  $\text{Cl}^- \text{ L}^{-1}$  + 15.4 g  $\text{Na}^+ \text{ L}^{-1}$ ; 2.3 L water (2.81 g  $\text{ZnO}$  + 1.20 g  $\text{Al}(\text{OH})_3 \text{ L}^{-1}$ ). (d) Feed water salinity = 7.96 g  $\text{Cl}^- \text{ L}^{-1}$  + 7.74 g  $\text{Na}^+ \text{ L}^{-1}$ ; 2.3 L water (1.42 g  $\text{FeSO}_4$  + 1.67 g  $\text{CaO}$  + 2.81 g  $\text{ZnO}$  + 1.34 g  $\text{Al}_2(\text{SO}_4)_3$ ).  $\text{Cl}^-$  ions (blue dots) and  $\text{Na}^+$  ions (red dots).  $\text{Na}^+$  and  $\text{Cl}^-$  ions are removed by separate processes. Temperature = 14 to 15.8 °C.

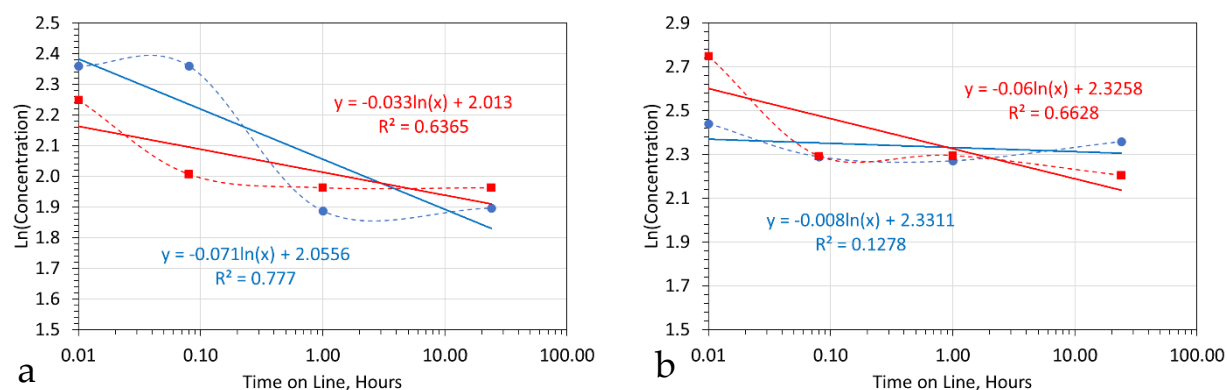

Figure S18. Water salinity desalination polymer quality control check. (a) Feed water salinity = 10.59 g  $\text{Cl}^- \text{ L}^{-1}$  + 9.47 g  $\text{Na}^+ \text{ L}^{-1}$ ; 2.3 L water (1.42 g  $\text{FeSO}_4$  + 1.51 g  $\text{MgSO}_4$  + 1.22 g  $\text{K}_2\text{CO}_3$  + 1.2 g  $\text{Al}(\text{OH})_3 \text{ L}^{-1}$ ). (b) Feed water salinity = 11.48 g  $\text{Cl}^- \text{ L}^{-1}$  + 15.61 g  $\text{Na}^+ \text{ L}^{-1}$ ; 2.3 L water 1.42 g  $\text{FeSO}_4$  + 1.51 g  $\text{MgSO}_4$  + 3.66 g  $\text{K}_2\text{CO}_3$  + 1.2 g  $\text{Al}(\text{OH})_3 \text{ L}^{-1}$ .  $\text{Cl}^-$  ions (blue dots) and  $\text{Na}^+$  ions (red dots).  $\text{Na}^+$  and  $\text{Cl}^-$  ions are removed by separate processes. Temperature = 14.8 to 16.7 °C

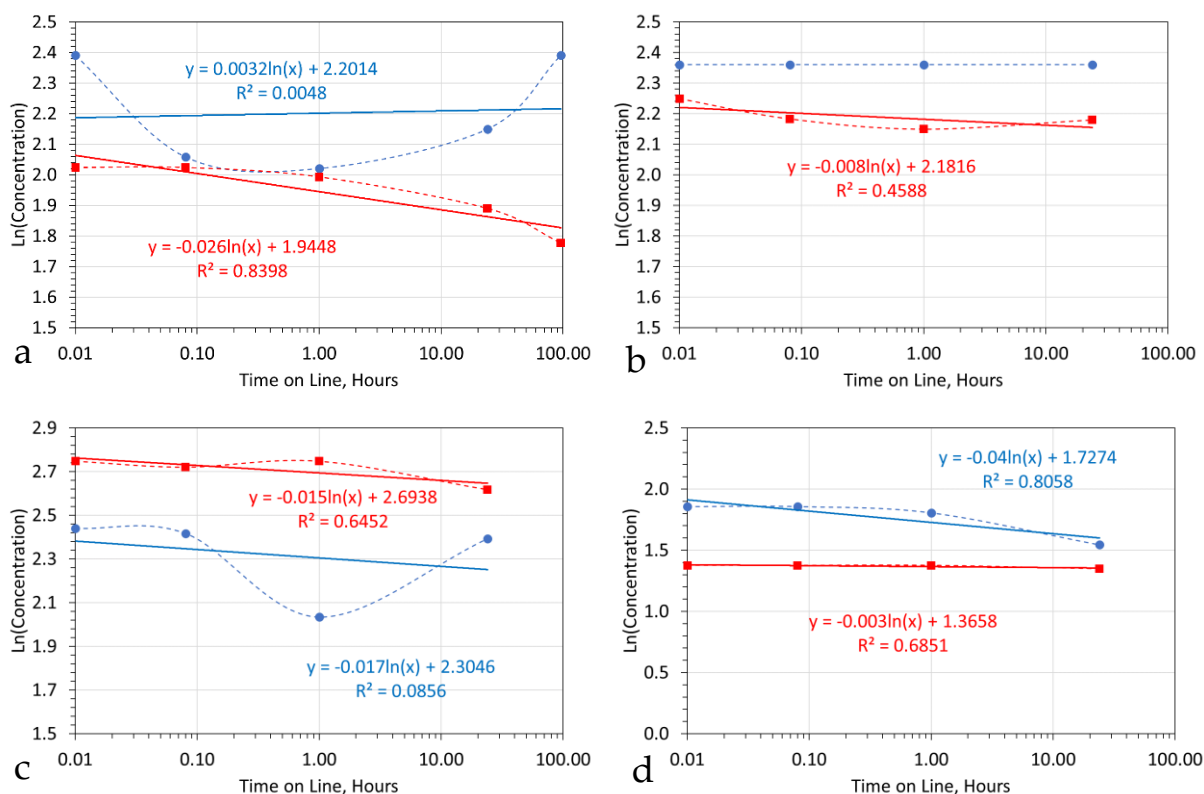

Figure S19. Water salinity desalination polymer quality control check. (a) Feed water salinity = 10.92 g Cl⁻ L⁻¹ + 7.57 g Na⁺ L⁻¹; 2.3 L water (1.42 g FeSO₄ + 1.51 g MgSO₄ + 1.2 g Al(OH)₃ L⁻¹). (b) Feed water salinity = 10.59 g Cl⁻ L⁻¹ + 9.47 g Na⁺ L⁻¹; 2.3 L water (1.42 g FeSO₄ + 1.51 g MgSO₄ + 1.2 g Al(OH)₃ L⁻¹). (c) Feed water salinity = 11.48 g Cl⁻ L⁻¹ + 15.61 g Na⁺ L⁻¹; 2.3 L water (1.42 g FeSO₄ + 1.51 g MgSO₄ + 1.2 g Al(OH)₃ L⁻¹). (d) Feed water salinity = 6.41 g Cl⁻ L⁻¹ + 3.96 g Na⁺ L⁻¹; 2.3 L water (1.42 g FeSO₄ + 1.51 g MgSO₄ + 2.81 g ZnO + 1.34 g Al₂(SO₄)₃ L⁻¹). Cl⁻ ions (blue dots) and Na⁺ ions (red dots). Na⁺ and Cl⁻ ions are removed by separate processes. Temperature = 14.7 to 16.3 °C

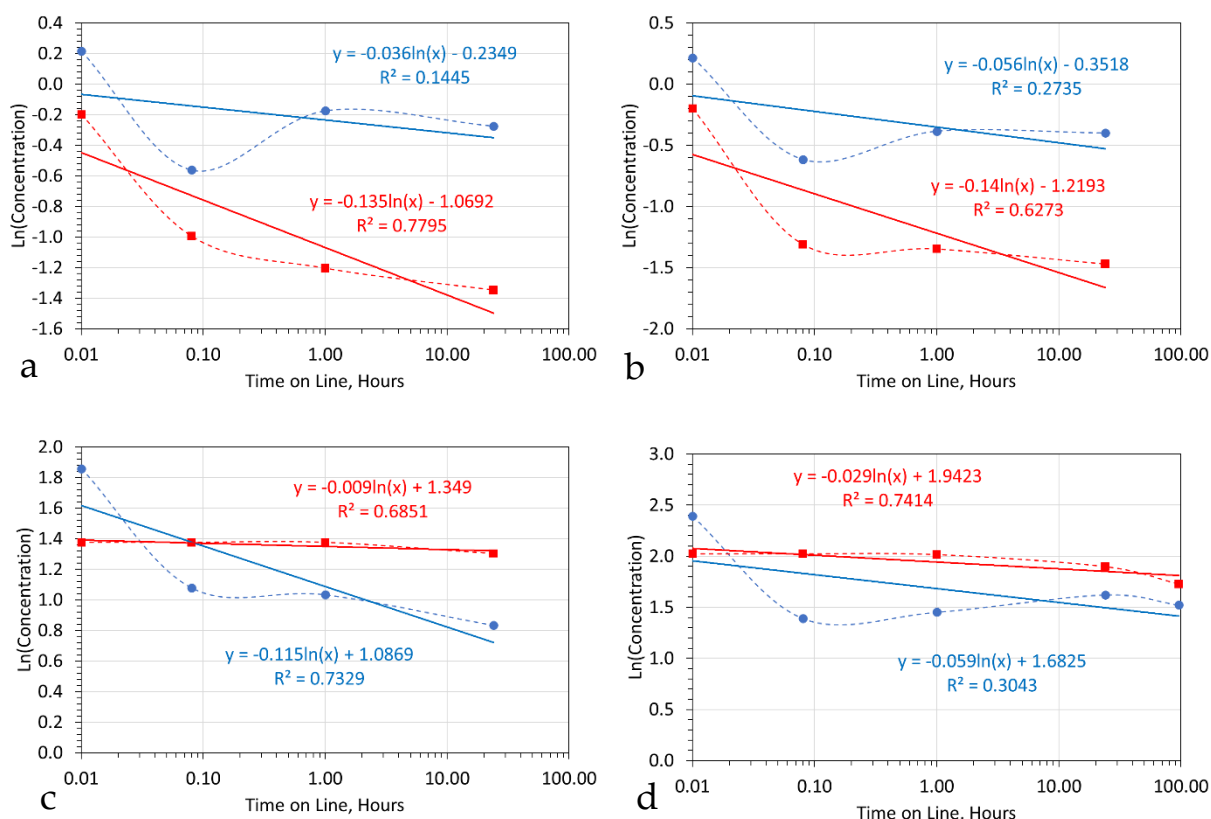

Figure S20. Water salinity desalination polymer quality control check. (a) Feed water salinity = 1.24 g Cl⁻ L⁻¹ + 0.82 g Na⁺ L⁻¹; 2.3 L water (1.42 g FeSO₄ + 3.02 g MgSO₄ + 1.67 g CaO + 1.36 g CaCO₃ + 2.51 g MnO₂ + 2.81 g ZnO + 1.34 g Al₂(SO₄)₃ + 3.6 g Al(OH)₃ L⁻¹). (b) Feed water salinity = 1.24 g Cl⁻ L⁻¹ + 0.82 g Na⁺ L⁻¹; 2.3 L water (1.42 g FeSO₄ + 3.02 g MgSO₄ + 1.67 g CaO + 1.36 g CaCO₃ + 2.51 g MnO₂ + 2.81 g ZnO + 1.34 g Al₂(SO₄)₃ + 3.6 g Al(OH)₃ L⁻¹). (1.42 g FeSO₄ + 1.51 g MgSO₄ + 1.2 g Al(OH)₃ L⁻¹). (c) Feed water salinity = 6.41 g Cl⁻ L⁻¹ + 3.96 g Na⁺ L⁻¹; 2.3 L water (1.42 g FeSO₄ + 1.51 g MgSO₄ + 1.67 g CaO + 1.36 g CaCO₃ + 2.51 g MnO₂ + 2.81 g ZnO + 1.34 g Al₂(SO₄)₃ + 1.2 g Al(OH)₃ L⁻¹). (d) Feed water salinity = 10.92 g Cl⁻ L⁻¹ + 7.57 g Na⁺ L⁻¹; 2.3 L water (1.42 g FeSO₄ + 1.51 g MgSO₄ + 1.67 g CaO + 1.34 g Al₂(SO₄)₃ L⁻¹). Cl⁻ ions (blue dots) and Na⁺ ions (red dots). Na⁺ and Cl⁻ ions are removed by separate processes. Temperature = 14.2 to 17.0 °C

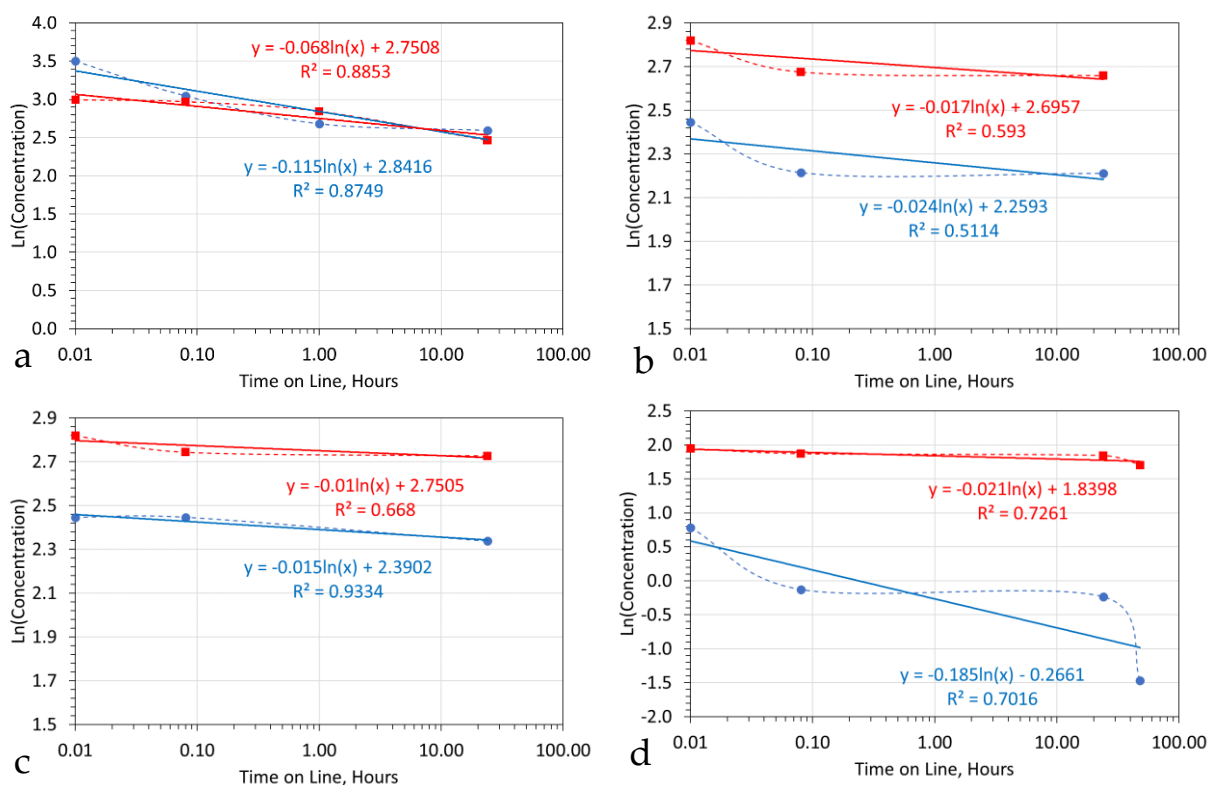

Figure S21. Water salinity desalination polymer quality control check. (a) Feed water salinity = 33.17 g Cl<sup>-</sup> L<sup>-1</sup> + 19.96 g Na<sup>+</sup> L<sup>-1</sup>; 2.3 L water (1.42 g FeSO<sub>4</sub> + 1.51 g MgSO<sub>4</sub> + 1.32 g Urea L<sup>-1</sup>). (b) Feed water salinity = 11.54 g Cl<sup>-</sup> L<sup>-1</sup> + 16.77 g Na<sup>+</sup> L<sup>-1</sup>; 2.3 L water (1.42 g FeSO<sub>4</sub> + 1.51 g MgSO<sub>4</sub> + 1.22 g K<sub>2</sub>CO<sub>3</sub> + 1.32 g Urea L<sup>-1</sup>). (c) Feed water salinity = 11.54 g Cl<sup>-</sup> L<sup>-1</sup> + 16.77 g Na<sup>+</sup> L<sup>-1</sup>; 2.3 L water (1.42 g FeSO<sub>4</sub> + 1.51 g MgSO<sub>4</sub> L<sup>-1</sup>). (d) Feed water salinity = 0.88 g Cl<sup>-</sup> L<sup>-1</sup> + 6.49 g Na<sup>+</sup> L<sup>-1</sup>; 2.3 L water (1.42 g FeSO<sub>4</sub> L<sup>-1</sup>). Cl<sup>-</sup> ions (blue dots) and Na<sup>+</sup> ions (red dots). Na<sup>+</sup> and Cl<sup>-</sup> ions are removed by separate processes. Temperature = 14.2 to 17.0 °C

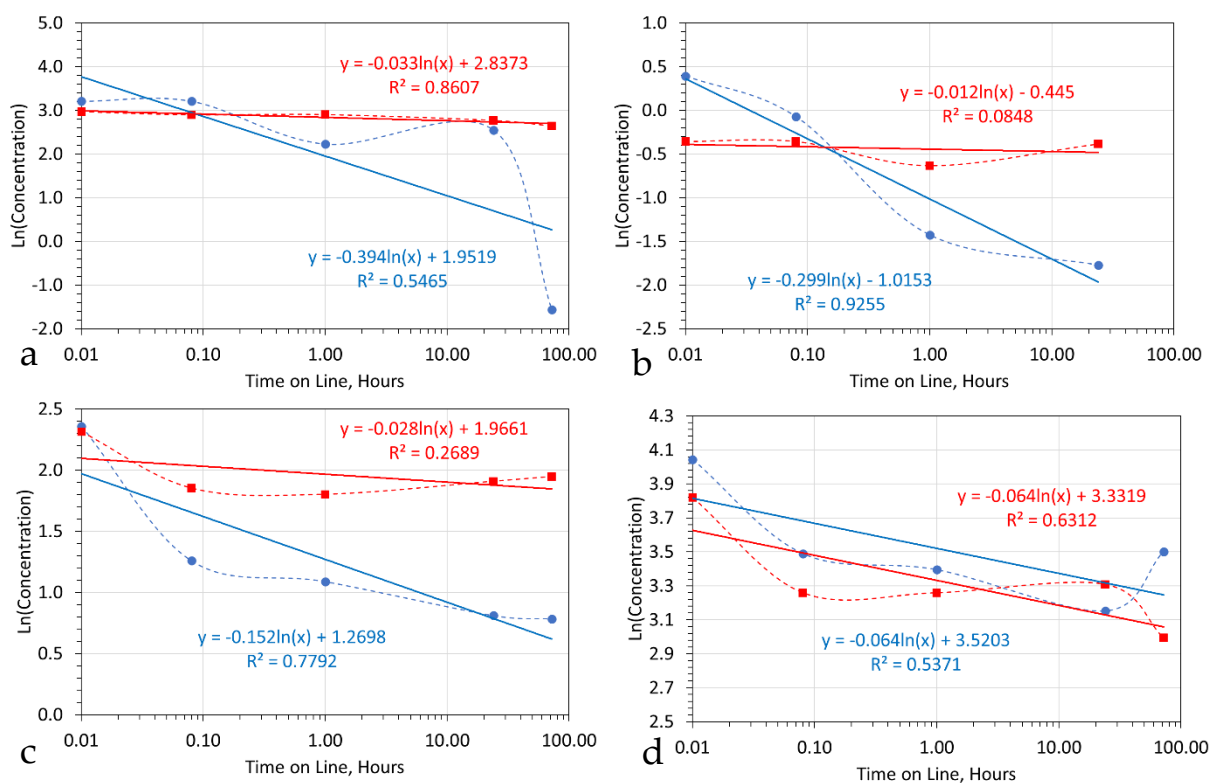

Figure S22. Water salinity desalination polymer quality control check. (a) Feed water salinity = 24.72 g Cl<sup>-</sup> L<sup>-1</sup> + 19.5 g Na<sup>+</sup> L<sup>-1</sup>; 2.3 L water (2.84 g FeSO<sub>4</sub> + 1.51 g MgSO<sub>4</sub> + 3.34 g CaO + 2.71 g CaCO<sub>3</sub> + 2.5 g K-Feldspar L<sup>-1</sup>). (b) Feed water salinity = 1.48 g Cl<sup>-</sup> L<sup>-1</sup> + 0.7 g Na<sup>+</sup> L<sup>-1</sup>; 2.3 L water (5.68 g FeSO<sub>4</sub> + 1.51 g MgSO<sub>4</sub> + 1.67 g CaO L<sup>-1</sup>). (c) Feed water salinity = 10.57 g Cl<sup>-</sup> L<sup>-1</sup> + 10.1 g Na<sup>+</sup> L<sup>-1</sup>; 2.3 L water (1.42 g FeSO<sub>4</sub> + 1.51 g MgSO<sub>4</sub> + 1.67 g CaO + 2.80 g ZnO L<sup>-1</sup>). (d) Feed water salinity = 57.04 g Cl<sup>-</sup> L<sup>-1</sup> + 45.57 g Na<sup>+</sup> L<sup>-1</sup>; 2.3 L water (1.42 g FeSO<sub>4</sub> + 1.51 g MgSO<sub>4</sub> + 1.67 g CaO + 1.22 g K<sub>2</sub>CO<sub>3</sub> + 2.80 g ZnO L<sup>-1</sup>). Cl<sup>-</sup> ions (blue dots) and Na<sup>+</sup> ions (red dots). Na<sup>+</sup> and Cl<sup>-</sup> ions are removed by separate processes. Temperature = 15 to 19.5 °C



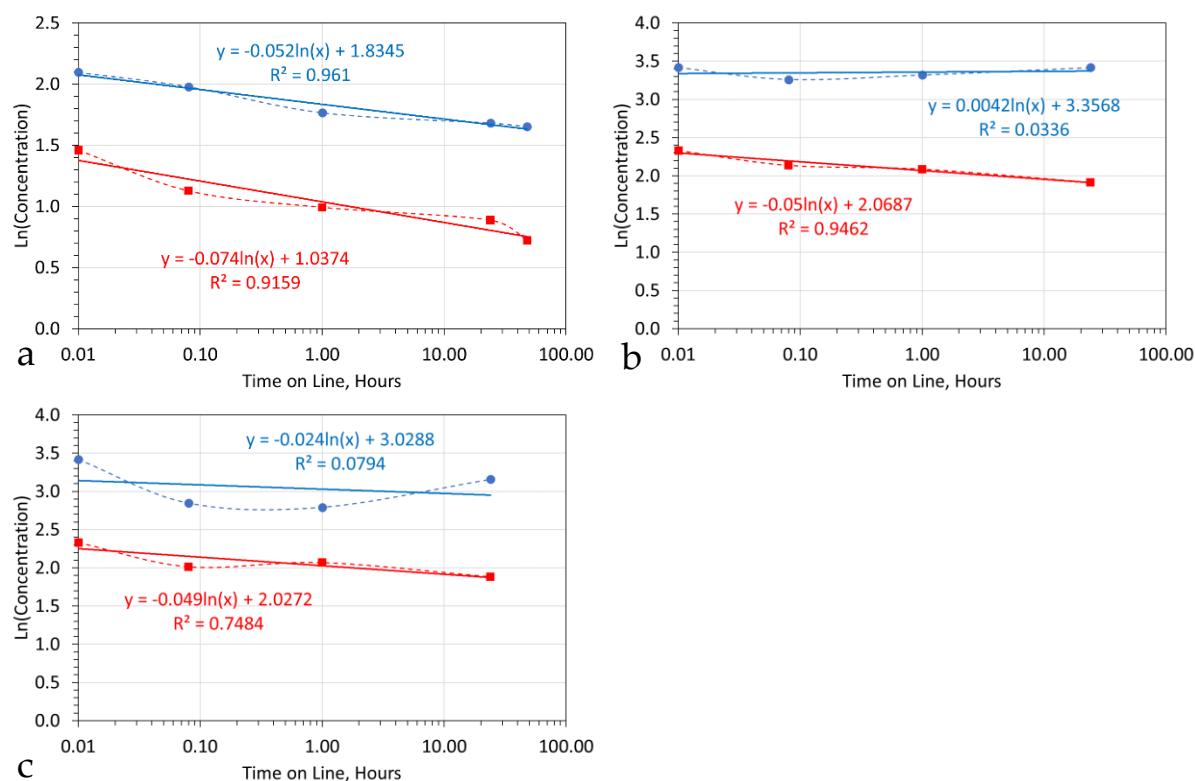

Figure S23. Water salinity desalination polymer quality control check. (a) Feed water salinity = 8.14 g Cl<sup>-</sup> L<sup>-1</sup> + 4.31 g Na<sup>+</sup> L<sup>-1</sup>; 2.3 L water (1.42 g FeSO<sub>4</sub> + 5.61 g ZnO L<sup>-1</sup>). (b) Feed water salinity = 30.47 g Cl<sup>-</sup> L<sup>-1</sup> + 10.3 g Na<sup>+</sup> L<sup>-1</sup>; 2.3 L water (1.42 g FeSO<sub>4</sub> + 5.61 g ZnO L<sup>-1</sup>). (c) Feed water salinity = 30.47 g Cl<sup>-</sup> L<sup>-1</sup> + 10.3 g Na<sup>+</sup> L<sup>-1</sup>; 2.3 L water (1.42 g FeSO<sub>4</sub> + 1.36 g Al<sup>0</sup> + 3.34 g CaO + 8.42 g ZnO L<sup>-1</sup>). Cl<sup>-</sup> ions (blue dots) and Na<sup>+</sup> ions (red dots). Na<sup>+</sup> and Cl<sup>-</sup> ions are removed by separate processes. Temperature = 11.5 to 16.4 °C

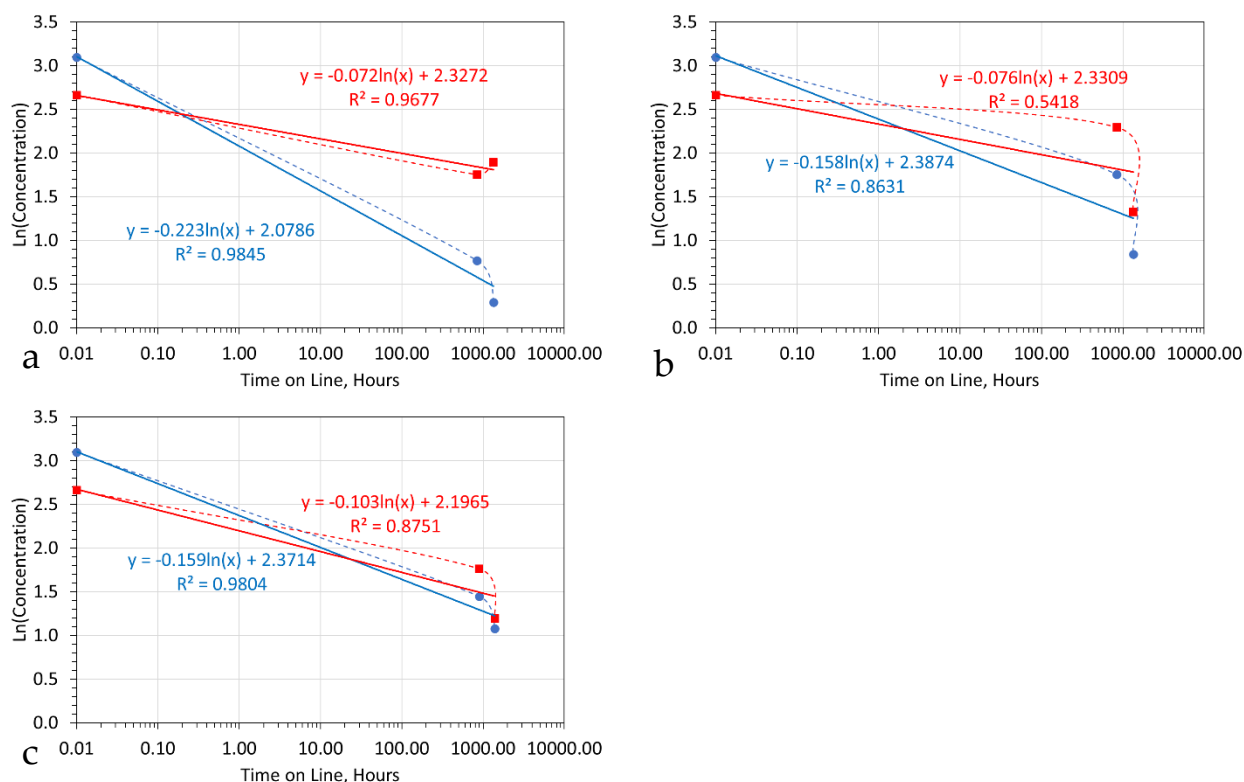

Figure S24. Water salinity desalination polymer quality control check. (a) Feed water salinity = 22.11 g Cl<sup>-</sup> L<sup>-1</sup> + 14.33 g Na<sup>+</sup> L<sup>-1</sup>; 14 L water (1.42 g FeSO<sub>4</sub> + 3.34 g CaO + 0.94 g gallic acid L<sup>-1</sup>). (b) Feed water salinity = 22.11 g Cl<sup>-</sup> L<sup>-1</sup> + 14.33 g Na<sup>+</sup> L<sup>-1</sup>; 14 L water (1.42 g FeSO<sub>4</sub> + 3.34 g CaO + 0.94 g gallic acid L<sup>-1</sup>). (c) Feed water salinity = 22.11 g Cl<sup>-</sup> L<sup>-1</sup> + 14.33 g Na<sup>+</sup> L<sup>-1</sup>; 14 L water (1.42 g FeSO<sub>4</sub> + 3.34 g CaO + 0.94 g gallic acid L<sup>-1</sup>). Cl<sup>-</sup> ions (blue dots) and Na<sup>+</sup> ions (red dots). Na<sup>+</sup> and Cl<sup>-</sup> ions are removed by separate processes. Temperature = 3.7 to 12.5 °C.

Table S1. Regressed ( $C_{t=n}/C_{t=0}$ ) ion concentration for chloride as a function of reaction time (hours)

| Trial | Hours  |        |        |        |        |        |        |
|-------|--------|--------|--------|--------|--------|--------|--------|
|       | 0.1    | 1      | 5      | 10     | 20     | 30     | 50     |
| 1     | 95.36% | 83.59% | 63.55% | 50.86% | 36.49% | 27.99% | 18.10% |
| 2     | 96.99% | 89.28% | 75.34% | 65.70% | 53.63% | 45.62% | 35.02% |
| 3     | 68.72% | 52.39% | 38.84% | 32.82% | 26.92% | 23.59% | 19.60% |
| 4     | 74.52% | 61.41% | 49.94% | 44.55% | 39.00% | 35.73% | 31.62% |
| 5     |        |        |        |        |        |        |        |
| 6     |        |        |        |        |        |        |        |
| 7     | 11.66% | 9.53%  | 8.18%  | 7.64%  | 7.12%  | 6.82%  | 6.46%  |
| 8     |        |        |        |        |        |        |        |
| 9     |        |        |        |        |        |        |        |
| 10    | 12.12% | 10.50% | 9.44%  | 9.01%  | 8.59%  | 8.34%  | 8.05%  |
| 11    |        |        |        |        |        |        |        |
| 12    |        |        |        |        |        |        |        |
| 13    | 1.97%  | 2.73%  | 3.36%  | 3.67%  | 3.99%  | 4.18%  | 4.44%  |
| 14    | 81.91% | 72.36% | 63.55% | 59.19% | 54.53% | 51.67% | 47.95% |
| 15    | 57.26% | 35.21% | 19.83% | 14.17% | 9.44%  | 7.16%  | 4.83%  |
| 16    | 92.01% | 83.67% | 73.81% | 68.26% | 61.87% | 57.75% | 52.20% |
| 17    | 31.89% | 21.69% | 15.37% | 12.95% | 10.74% | 9.55%  | 8.17%  |
| 18    | 66.77% | 67.15% | 67.41% | 67.52% | 67.63% | 67.70% | 67.78% |
| 19    | 81.67% | 59.07% | 35.83% | 25.45% | 16.13% | 11.55% | 6.94%  |
| 20    | 87.59% | 66.16% | 40.06% | 27.57% | 16.29% | 10.90% | 5.77%  |

|    |        |        |        |        |        |        |        |
|----|--------|--------|--------|--------|--------|--------|--------|
| 21 | 95.09% | 84.92% | 68.90% | 58.79% | 46.90% | 39.39% | 29.82% |
| 22 | 97.62% | 89.43% | 72.17% | 59.61% | 44.01% | 34.12% | 22.07% |
| 23 | 52.33% | 42.90% | 36.05% | 33.09% | 30.16% | 28.47% | 26.36% |
| 24 | 52.32% | 36.43% | 25.23% | 20.72% | 16.54% | 14.29% | 11.69% |
| 25 | 63.23% | 46.05% | 32.64% | 26.94% | 21.51% | 18.53% | 15.04% |
| 26 | 48.48% | 44.90% | 42.35% | 41.25% | 40.13% | 39.48% | 38.66% |
| 27 | 82.08% | 72.36% | 63.33% | 58.86% | 54.07% | 51.14% | 47.32% |
| 28 | 65.81% | 64.79% | 64.08% | 63.76% | 63.45% | 63.26% | 63.03% |
| 29 | 55.59% | 54.58% | 53.86% | 53.56% | 53.25% | 53.06% | 52.83% |
| 30 | 93.78% | 85.19% | 73.80% | 67.02% | 59.04% | 53.85% | 46.85% |
| 31 | 99.99% | 99.92% | 99.53% | 99.00% | 97.86% | 96.67% | 94.22% |
| 32 | 97.40% | 92.78% | 85.57% | 80.77% | 74.62% | 70.32% | 64.13% |
| 33 |        |        |        |        |        |        |        |
| 34 |        |        |        |        |        |        |        |
| 35 | 40.58% | 36.70% | 33.99% | 32.82% | 31.66% | 30.99% | 30.14% |
| 36 | 62.69% | 54.92% | 49.00% | 46.35% | 43.65% | 42.06% | 40.03% |
| 37 | 68.37% | 61.95% | 56.97% | 54.72% | 52.40% | 51.01% | 49.24% |
| 38 | 85.95% | 79.07% | 72.67% | 69.47% | 65.99% | 63.82% | 60.96% |
| 39 | 86.00% | 90.55% | 92.86% | 93.67% | 94.40% | 94.79% | 95.24% |
| 40 | 52.23% | 62.70% | 69.03% | 71.49% | 73.80% | 75.07% | 76.61% |
| 41 | 70.72% | 64.28% | 59.22% | 56.91% | 54.52% | 53.09% | 51.26% |
| 42 | 71.43% | 65.16% | 60.23% | 57.97% | 55.63% | 54.23% | 52.44% |
| 43 | 72.06% | 63.69% | 56.88% | 53.73% | 50.46% | 48.50% | 45.99% |
| 44 | 99.91% | 98.59% | 90.68% | 79.86% | 59.64% | 43.14% | 21.18% |
| 45 | 32.69% | 28.12% | 25.01% | 23.70% | 22.41% | 21.67% | 20.74% |
| 46 | 55.14% | 53.37% | 52.12% | 51.58% | 51.03% | 50.71% | 50.30% |
| 47 | 41.01% | 32.99% | 27.47% | 25.16% | 22.91% | 21.62% | 20.04% |
| 48 | 59.52% | 50.67% | 43.99% | 41.04% | 38.05% | 36.30% | 34.10% |
| 49 |        |        |        |        |        |        |        |
| 50 | 79.36% | 79.27% | 79.21% | 79.18% | 79.16% | 79.14% | 79.12% |
| 51 | 65.74% | 46.62% | 31.36% | 24.94% | 18.96% | 15.76% | 12.12% |
| 52 | 52.95% | 31.61% | 17.48% | 12.42% | 8.26%  | 6.27%  | 4.25%  |
| 53 | 71.58% | 67.44% | 64.30% | 62.88% | 61.42% | 60.55% | 59.44% |
| 54 | 76.80% | 68.12% | 60.72% | 57.22% | 53.53% | 51.29% | 48.41% |
| 55 | 68.47% | 66.38% | 64.86% | 64.19% | 63.51% | 63.11% | 62.60% |
| 56 | 70.12% | 62.10% | 55.70% | 52.76% | 49.72% | 47.91% | 45.59% |
| 57 | 54.70% | 61.37% | 65.63% | 67.36% | 69.02% | 69.96% | 71.12% |
| 58 | 36.58% | 45.75% | 51.91% | 54.45% | 56.92% | 58.33% | 60.06% |
| 59 | 53.34% | 47.01% | 42.40% | 40.38% | 38.36% | 37.17% | 35.67% |
| 60 | 53.00% | 58.62% | 62.30% | 63.81% | 65.28% | 66.12% | 67.16% |
| 61 | 46.67% | 50.60% | 53.28% | 54.40% | 55.52% | 56.16% | 56.96% |
| 62 | 38.89% | 69.14% | 82.58% | 86.57% | 89.70% | 91.20% | 92.79% |
| 63 | 44.64% | 66.10% | 77.13% | 80.86% | 84.05% | 85.68% | 87.52% |
| 64 | 79.30% | 74.20% | 70.06% | 68.13% | 66.10% | 64.87% | 63.28% |
| 65 | 35.53% | 39.21% | 41.78% | 42.87% | 43.97% | 44.60% | 45.40% |
| 66 | 74.47% | 86.36% | 91.39% | 92.97% | 94.26% | 94.91% | 95.62% |
| 67 | 97.45% | 97.52% | 97.57% | 97.59% | 97.62% | 97.63% | 97.64% |
| 68 | 76.55% | 62.70% | 50.18% | 44.23% | 38.10% | 34.48% | 29.97% |
| 69 | 66.80% | 51.78% | 39.59% | 34.18% | 28.82% | 25.77% | 22.06% |
| 70 | 68.23% | 69.14% | 69.76% | 70.02% | 70.28% | 70.44% | 70.63% |
| 71 | 41.03% | 46.05% | 49.47% | 50.91% | 52.33% | 53.16% | 54.19% |
| 72 | 83.89% | 82.66% | 81.75% | 81.34% | 80.93% | 80.68% | 80.37% |
| 73 | 51.89% | 60.87% | 66.46% | 68.68% | 70.79% | 71.97% | 73.41% |
| 74 | 69.73% | 73.04% | 75.17% | 76.05% | 76.90% | 77.38% | 77.98% |
| 75 | 37.33% | 39.72% | 41.38% | 42.09% | 42.80% | 43.22% | 43.74% |
| 76 | 98.61% | 94.97% | 87.92% | 82.64% | 75.38% | 70.07% | 62.18% |
| 77 | 46.32% | 42.25% | 39.37% | 38.13% | 36.88% | 36.15% | 35.23% |
| 78 |        |        |        |        |        |        |        |
| 79 | 61.95% | 62.36% | 62.64% | 62.76% | 62.88% | 62.96% | 63.04% |
| 80 | 94.08% | 92.77% | 91.69% | 91.18% | 90.64% | 90.31% | 89.88% |
| 81 | 84.34% | 87.67% | 89.60% | 90.34% | 91.03% | 91.41% | 91.87% |
| 82 | 93.82% | 89.34% | 84.55% | 81.93% | 78.94% | 76.99% | 74.33% |
| 83 | 93.79% | 89.52% | 85.04% | 82.62% | 79.86% | 78.07% | 75.62% |
| 84 | 62.32% | 65.43% | 67.49% | 68.35% | 69.19% | 69.68% | 70.28% |
| 85 | 61.00% | 65.03% | 67.67% | 68.75% | 69.82% | 70.42% | 71.17% |
| 86 | 81.56% | 77.85% | 74.89% | 73.51% | 72.08% | 71.21% | 70.09% |
| 87 | 64.97% | 65.95% | 66.62% | 66.90% | 67.19% | 67.35% | 67.56% |

Table S2. Regressed ( $C_{t=n}/C_{t=0}$ ) ion concentration for sodium as a function of reaction time (hours)

| Trial | Hours   |        |        |        |        |        |        |
|-------|---------|--------|--------|--------|--------|--------|--------|
|       | 0.1     | 1      | 5      | 10     | 20     | 30     | 50     |
| 1     | 38.27%  | 42.94% | 46.16% | 47.53% | 48.88% | 49.67% | 50.65% |
| 2     | 62.87%  | 57.88% | 54.17% | 52.51% | 50.83% | 49.83% | 48.57% |
| 3     | 63.75%  | 60.17% | 57.54% | 56.37% | 55.19% | 54.49% | 53.60% |
| 4     | 54.92%  | 45.88% | 39.22% | 36.31% | 33.41% | 31.72% | 29.61% |
| 5     |         |        |        |        |        |        |        |
| 6     |         |        |        |        |        |        |        |
| 7     | 52.92%  | 50.51% | 48.78% | 48.04% | 47.28% | 46.84% | 46.28% |
| 8     |         |        |        |        |        |        |        |
| 9     |         |        |        |        |        |        |        |
| 10    | 79.44%  | 72.52% | 66.66% | 63.86% | 60.91% | 59.11% | 56.77% |
| 11    |         |        |        |        |        |        |        |
| 12    |         |        |        |        |        |        |        |
| 13    | 69.99%  | 60.70% | 53.20% | 49.75% | 46.19% | 44.07% | 41.36% |
| 14    | 57.91%  | 47.47% | 39.64% | 36.20% | 32.78% | 30.79% | 28.31% |
| 15    | 37.14%  | 25.63% | 18.26% | 15.39% | 12.76% | 11.33% | 9.66%  |
| 16    | 33.71%  | 27.15% | 22.76% | 20.94% | 19.18% | 18.18% | 16.95% |
| 17    | 17.09%  | 11.38% | 8.11%  | 6.90%  | 5.81%  | 5.23%  | 4.55%  |
| 18    | 51.28%  | 44.55% | 39.70% | 37.58% | 35.47% | 34.24% | 32.68% |
| 19    | 69.55%  | 62.57% | 57.08% | 54.58% | 52.00% | 50.46% | 48.48% |
| 20    | 52.52%  | 47.92% | 44.59% | 43.15% | 41.69% | 40.83% | 39.75% |
| 21    | 41.24%  | 35.29% | 31.15% | 29.39% | 27.64% | 26.63% | 25.37% |
| 22    | 70.97%  | 64.44% | 59.29% | 56.94% | 54.51% | 53.05% | 51.18% |
| 23    | 86.22%  | 82.06% | 78.52% | 76.82% | 75.01% | 73.90% | 72.44% |
| 24    | 97.24%  | 87.74% | 68.12% | 54.31% | 37.88% | 27.99% | 16.66% |
| 25    | 83.53%  | 96.47% | 98.84% | 99.29% | 99.56% | 99.67% | 99.77% |
| 26    | 86.47%  | 84.39% | 82.77% | 82.03% | 81.25% | 80.79% | 80.19% |
| 27    |         |        |        |        |        |        |        |
| 28    | 77.15%  | 73.62% | 70.90% | 69.67% | 68.39% | 67.63% | 66.64% |
| 29    | 94.47%  | 98.62% | 99.48% | 99.66% | 99.78% | 99.83% | 99.87% |
| 30    |         |        |        |        |        |        |        |
| 31    |         |        |        |        |        |        |        |
| 32    |         |        |        |        |        |        |        |
| 33    |         |        |        |        |        |        |        |
| 34    |         |        |        |        |        |        |        |
| 35    | 61.23%  | 61.94% | 62.43% | 62.64% | 62.84% | 62.96% | 63.12% |
| 36    | 99.93%  | 99.51% | 98.10% | 96.61% | 94.00% | 91.66% | 87.45% |
| 37    | 96.80%  | 93.68% | 89.92% | 87.71% | 85.06% | 83.28% | 80.77% |
| 38    | 70.71%  | 63.95% | 58.62% | 56.18% | 53.66% | 52.15% | 50.22% |
| 39    | 82.51%  | 76.89% | 72.11% | 69.82% | 67.39% | 65.90% | 63.95% |
| 40    | 75.30%  | 71.92% | 69.35% | 68.19% | 67.00% | 66.28% | 65.37% |
| 41    | 97.05%  | 94.85% | 92.42% | 91.07% | 89.49% | 88.44% | 86.99% |
| 42    | 100.00% | 99.99% | 99.90% | 99.70% | 99.09% | 98.25% | 96.05% |
| 43    |         |        |        |        |        |        |        |
| 44    | 58.97%  | 59.40% | 59.69% | 59.82% | 59.95% | 60.02% | 60.12% |
| 45    | 60.99%  | 63.57% | 65.30% | 66.03% | 66.75% | 67.16% | 67.68% |
| 46    | 58.65%  | 56.10% | 54.26% | 53.45% | 52.64% | 52.16% | 51.56% |
| 47    | 92.77%  | 90.29% | 88.10% | 87.02% | 85.85% | 85.12% | 84.15% |
| 48    | 96.82%  | 89.53% | 77.01% | 68.50% | 57.81% | 50.63% | 40.90% |
| 49    | 92.68%  | 92.09% | 91.65% | 91.45% | 91.25% | 91.13% | 90.98% |
| 50    | 86.53%  | 85.96% | 85.55% | 85.37% | 85.19% | 85.08% | 84.95% |
| 51    | 94.19%  | 90.30% | 86.23% | 84.03% | 81.52% | 79.89% | 77.67% |
| 52    | 22.65%  | 75.00% | 91.27% | 94.58% | 96.66% | 97.49% | 98.25% |
| 53    | 60.72%  | 67.91% | 72.33% | 74.08% | 75.73% | 76.66% | 77.78% |
| 54    | 85.04%  | 81.92% | 79.41% | 78.24% | 77.01% | 76.26% | 75.30% |
| 55    | 74.68%  | 68.83% | 64.17% | 62.01% | 59.77% | 58.42% | 56.68% |
| 56    | 98.24%  | 95.74% | 92.19% | 89.90% | 86.98% | 84.93% | 81.94% |
| 57    | 70.08%  | 68.41% | 67.21% | 66.68% | 66.14% | 65.83% | 65.43% |
| 58    |         |        |        |        |        |        |        |
| 59    | 83.54%  | 71.29% | 59.07% | 52.90% | 46.29% | 42.27% | 37.13% |
| 60    | 44.11%  | 38.67% | 34.83% | 33.19% | 31.55% | 30.60% | 29.40% |
| 61    | 32.77%  | 30.89% | 29.58% | 29.02% | 28.46% | 28.14% | 27.73% |
| 62    | 66.75%  | 75.06% | 79.79% | 81.58% | 83.22% | 84.12% | 85.19% |
| 63    | 63.07%  | 66.83% | 69.28% | 70.30% | 71.28% | 71.85% | 72.55% |
| 64    | 86.52%  | 88.23% | 89.31% | 89.74% | 90.16% | 90.39% | 90.68% |
| 65    | 96.31%  | 94.74% | 93.27% | 92.53% | 91.70% | 91.18% | 90.48% |
| 66    | 76.58%  | 90.30% | 94.93% | 96.18% | 97.12% | 97.57% | 98.03% |
| 67    | 78.12%  | 88.18% | 92.45% | 93.79% | 94.91% | 95.46% | 96.08% |
| 68    |         |        |        |        |        |        |        |
| 69    | 73.69%  | 78.49% | 81.38% | 82.52% | 83.59% | 84.19% | 84.92% |
| 70    | 83.89%  | 86.20% | 87.64% | 88.21% | 88.76% | 89.07% | 89.45% |

|    |        |        |        |        |        |        |        |
|----|--------|--------|--------|--------|--------|--------|--------|
| 71 | 96.83% | 90.42% | 79.97% | 72.98% | 64.14% | 58.11% | 49.70% |
| 72 | 92.32% | 94.75% | 95.99% | 96.43% | 96.82% | 97.03% | 97.28% |
| 73 | 97.35% | 97.37% | 97.39% | 97.40% | 97.41% | 97.42% | 97.42% |
| 74 | 98.92% | 96.94% | 93.73% | 91.50% | 88.53% | 86.37% | 83.12% |
| 75 | 99.89% | 99.24% | 97.17% | 95.03% | 91.35% | 88.12% | 82.45% |
| 76 |        |        |        |        |        |        |        |
| 77 |        |        |        |        |        |        |        |
| 78 | 92.71% | 92.65% | 92.61% | 92.60% | 92.58% | 92.57% | 92.56% |
| 79 | 77.74% | 76.47% | 75.54% | 75.13% | 74.72% | 74.47% | 74.16% |
| 80 | 97.17% | 94.73% | 91.90% | 90.28% | 88.35% | 87.07% | 85.26% |
| 81 | 64.12% | 61.94% | 60.37% | 59.68% | 58.98% | 58.57% | 58.05% |
| 82 | 94.10% | 92.86% | 91.84% | 91.36% | 90.85% | 90.55% | 90.14% |
| 83 | 73.68% | 82.05% | 86.41% | 87.97% | 89.36% | 90.10% | 90.97% |
| 84 | 96.18% | 94.98% | 93.94% | 93.43% | 92.88% | 92.53% | 92.08% |
| 85 | 99.41% | 98.18% | 96.04% | 94.48% | 92.33% | 90.73% | 88.25% |
| 86 |        |        |        |        |        |        |        |
| 87 | 99.42% | 99.08% | 98.72% | 98.53% | 98.31% | 98.16% | 97.97% |

---
